# Supplementary material for: PpTFDB: A pigeonpea transcription factor database for exploring functional genomics in legumes
Source: PLoS One. 2017 Jun 26;12(6):e0179736. doi: 10.1371/journal.pone.0179736 (PMC5484553; doi:10.1371/journal.pone.0179736)
Supplement: S2 Table — (XLSX) [file pone.0179736.s005.xlsx]

## Sheet: Sheet1
TF_ID	Ortholog	Ortholog_ID	Bit Score	E-Value	%Identities	Start	End
Ccajan0147	Soybean	Glyma04g36620.2	4437	0	85	300	1301
Ccajan0358	Soybean	Glyma11g13390.2	4341	0	86	40	1004
Ccajan0129	Soybean	Glyma10g40510.2	3946	0	91	1	794
Ccajan0555	Soybean	Glyma02g46690.1	2553	0	84	1	588
Ccajan0710	Soybean	Glyma18g14530.1	2521	0	91	1	542
Ccajan0545	Soybean	Glyma13g31970.1	2461	0	92	360	879
Ccajan0091	Soybean	Glyma14g03850.1	2267	0	88	47	527
Ccajan0790	Soybean	Glyma19g35080.1	2178	0	89	20	484
Ccajan0557	Soybean	Glyma02g46730.1	2135	0	90	106	545
Ccajan0219	Soybean	Glyma01g06550.1	2032	0	83	1	455
Ccajan10072	Soybean	Glyma12g36260.6	1208	7e-167	83	1	290
Ccajan10087	Soybean	Glyma10g34050.3	1436	0	89	81	387
Ccajan10106	Soybean	Glyma07g32250.1	1441	0	84	1	326
Ccajan10147	Soybean	Glyma18g41520.1	1049	8e-145	89	1	226
Ccajan10163	Soybean	Glyma15g37220.2	608	3e-76	87	80	217
Ccajan10217	Soybean	Glyma03g03760.1	2976	0	83	4	732
Ccajan10406	Soybean	Glyma12g01350.4	3244	0	88	1	702
Ccajan10417	Soybean	Glyma17g34210.2	513	1e-65	81	19	147
Ccajan10438	Soybean	Glyma13g36120.1	2616	0	85	7	576
Ccajan10455	Soybean	Glyma12g31020.1	1907	0	87	18	419
Ccajan10492	Soybean	Glyma19g12650.3	796	3e-108	93	17	181
Ccajan10495	Soybean	Glyma09g38650.3	1906	0	90	30	426
Ccajan10528	Soybean	Glyma11g20520.1	3404	0	83	1	793
Ccajan10548	Soybean	Glyma08g17371.1	1217	2e-167	84	40	327
Ccajan10652	Soybean	Glyma12g20160.2	1366	0	81	17	397
Ccajan10707	Soybean	Glyma05g22500.3	992	3e-134	82	1	286
Ccajan10723	Soybean	Glyma14g39080.1	292	2e-31	100	1	51
Ccajan10724	Soybean	Glyma14g39080.1	303	5e-33	98	1	52
Ccajan10737	Soybean	Glyma20g28870.1	1492	0	82	1	365
Ccajan10751	Soybean	Glyma09g09790.1	2813	0	83	1	629
Ccajan10824	Soybean	Glyma09g41670.1	2346	0	86	1	543
Ccajan10904	Soybean	Glyma20g04630.1	1354	0	83	12	334
Ccajan10906	Soybean	Glyma02g13670.1	1629	0	93	1	336
Ccajan10969	Soybean	Glyma01g43800.1	1457	0	86	1	338
Ccajan10992	Soybean	Glyma19g37380.2	589	1e-76	84	1	138
Ccajan11058	Soybean	Glyma17g12560.2	1437	0	86	1	310
Ccajan11226	Soybean	Glyma02g43510.2	1868	0	85	1	421
Ccajan11255	Soybean	Glyma17g16720.1	1506	0	81	2	371
Ccajan11282	Soybean	Glyma14g39280.1	1226	1e-170	92	1	257
Ccajan11290	Soybean	Glyma03g39701.1	640	9e-74	81	1	142
Ccajan11330	Soybean	Glyma01g42050.1	1151	4e-159	84	1	255
Ccajan11355	Soybean	Glyma12g00540.1	1737	0	91	1	356
Ccajan11412	Soybean	Glyma04g34080.1	446	2e-57	99	1	92
Ccajan1149	Soybean	Glyma20g02970.3	3366	0	92	1	666
Ccajan11597	Soybean	Glyma17g36730.1	1343	0	95	1	311
Ccajan11659	Soybean	Glyma19g36100.1	2173	0	87	1	470
Ccajan11675	Soybean	Glyma06g47210.1	4267	0	92	1	842
Ccajan11676	Soybean	Glyma06g47220.2	1279	6e-177	86	1	290
Ccajan11759	Soybean	Glyma20g32520.1	2337	0	91	1	507
Ccajan11822	Soybean	Glyma18g39920.2	3311	0	86	3	733
Ccajan11829	Soybean	Glyma17g01150.1	2556	0	91	26	545
Ccajan11865	Soybean	Glyma10g44620.1	1193	6e-163	83	41	325
Ccajan11911	Soybean	Glyma09g37930.2	628	2e-81	81	1	177
Ccajan11921	Soybean	Glyma17g11330.3	676	8e-88	95	190	319
Ccajan11927	Soybean	Glyma20g29130.1	507	9e-65	83	1	120
Ccajan11944	Soybean	Glyma11g13523.1	958	5e-123	87	1	203
Ccajan11944	Soybean	Glyma11g13523.1	626	3e-74	84	533	675
Ccajan11990	Soybean	Glyma13g07475.2	1578	0	86	25	403
Ccajan12036	Soybean	Glyma18g09040.1	2725	0	90	1	577
Ccajan12037	Soybean	Glyma18g09030.1	2606	0	91	1	544
Ccajan12093	Soybean	Glyma14g06080.2	1478	0	82	1	393
Ccajan12148	Soybean	Glyma06g17420.1	1229	2e-168	82	1	334
Ccajan12152	Soybean	Glyma19g36830.1	1302	5e-180	82	1	330
Ccajan12178	Soybean	Glyma13g03880.2	1241	1e-172	93	6	266
Ccajan12207	Soybean	Glyma15g06960.2	896	4e-122	82	1	213
Ccajan12253	Soybean	Glyma20g26991.1	1511	0	86	1	353
Ccajan1228	Soybean	Glyma01g38290.1	2155	0	86	1	514
Ccajan12289	Soybean	Glyma15g42750.2	1621	0	90	34	363
Ccajan12384	Soybean	Glyma20g08250.1	1331	0	92	1	270
Ccajan12422	Soybean	Glyma02g15920.1	1459	0	83	3	355
Ccajan12432	Soybean	Glyma07g04950.7	1473	0	81	1	390
Ccajan12480	Soybean	Glyma01g04310.1	995	3e-136	86	1	241
Ccajan12481	Soybean	Glyma15g07230.1	1562	0	81	1	368
Ccajan12483	Soybean	Glyma10g34910.2	1332	0	85	1	353
Ccajan12609	Soybean	Glyma02g09451.1	2405	0	85	7	569
Ccajan12626	Soybean	Glyma13g05270.1	1219	1e-168	91	1	291
Ccajan12656	Soybean	Glyma05g02550.2	1782	0	93	1	370
Ccajan12659	Soybean	Glyma07g40190.1	1059	1e-144	83	1	273
Ccajan12685	Soybean	Glyma13g30280.1	1178	3e-161	90	1	308
Ccajan12707	Soybean	Glyma02g07460.1	1156	2e-159	84	1	274
Ccajan12733	Soybean	Glyma14g35770.1	1000	3e-136	87	14	260
Ccajan12787	Soybean	Glyma19g34360.1	1341	0	90	1	292
Ccajan12859	Soybean	Glyma07g10240.1	1472	0	87	1	324
Ccajan12895	Soybean	Glyma19g41010.2	1817	0	88	81	495
Ccajan12963	Soybean	Glyma12g37026.1	1271	4e-176	84	8	300
Ccajan12992	Soybean	Glyma02g13960.2	964	1e-132	91	1	199
Ccajan13013	Soybean	Glyma09g08350.1	4374	0	92	52	1125
Ccajan13024	Soybean	Glyma14g38010.1	2667	0	92	1	575
Ccajan13105	Soybean	Glyma06g17170.1	1681	0	88	1	409
Ccajan13115	Soybean	Glyma08g41260.2	1635	0	81	1	413
Ccajan13118	Soybean	Glyma05g07380.1	459	8e-57	82	1	103
Ccajan13119	Soybean	Glyma12g09400.1	820	1e-109	97	173	323
Ccajan13147	Soybean	Glyma03g10320.1	3174	0	86	3	696
Ccajan13194	Soybean	Glyma18g50900.1	974	2e-133	86	1	224
Ccajan13208	Soybean	Glyma02g46270.1	1567	0	83	1	362
Ccajan13237	Soybean	Glyma05g08150.1	1968	0	89	1	454
Ccajan13255	Soybean	Glyma08g24340.1	1243	7e-172	85	6	283
Ccajan13264	Soybean	Glyma13g29510.1	1013	6e-138	82	1	243
Ccajan13283	Soybean	Glyma18g07960.1	1040	2e-142	95	1	203
Ccajan13352	Soybean	Glyma10g42830.1	1910	0	82	96	571
Ccajan13373	Soybean	Glyma20g31871.1	7457	0	85	1	1664
Ccajan13427	Soybean	Glyma01g02760.1	1221	3e-165	82	1	291
Ccajan13496	Soybean	Glyma19g31960.1	1069	3e-140	84	190	418
Ccajan13496	Soybean	Glyma19g31960.1	694	2e-84	93	1	152
Ccajan13527	Soybean	Glyma19g41310.1	1474	0	94	1	304
Ccajan13528	Soybean	Glyma05g37390.2	1254	1e-173	84	1	287
Ccajan13533	Soybean	Glyma05g06351.1	3577	0	84	1	787
Ccajan13554	Soybean	Glyma04g03360.1	362	4e-45	88	1	82
Ccajan13599	Soybean	Glyma18g39771.2	1689	0	93	1	357
Ccajan13714	Soybean	Glyma18g47980.2	2378	0	84	81	710
Ccajan13764	Soybean	Glyma15g11680.1	2186	0	89	69	577
Ccajan13782	Soybean	Glyma01g42410.1	758	3e-101	99	139	281
Ccajan13783	Soybean	Glyma19g37660.1	2653	0	87	3	578
Ccajan13798	Soybean	Glyma14g13750.2	758	3e-99	99	264	407
Ccajan13824	Soybean	Glyma09g30030.1	761	6e-99	100	38	171
Ccajan13876	Soybean	Glyma11g33620.1	1266	2e-174	82	1	336
Ccajan13877	Soybean	Glyma19g28515.1	1761	0	84	1	403
Ccajan13889	Soybean	Glyma08g23380.1	1439	0	93	1	313
Ccajan14088	Soybean	Glyma17g13680.1	2068	0	86	59	514
Ccajan14131	Soybean	Glyma05g35561.1	2540	0	94	5	514
Ccajan14134	Soybean	Glyma02g01740.1	462	1e-56	93	1	91
Ccajan14154	Soybean	Glyma04g02860.1	1754	0	96	1	338
Ccajan14184	Soybean	Glyma04g24010.2	1494	0	86	1	347
Ccajan14197	Soybean	Glyma11g18401.1	2077	0	86	1	460
Ccajan14365	Soybean	Glyma08g21610.1	4121	0	92	1	838
Ccajan14446	Soybean	Glyma02g45371.1	790	5e-105	92	1	167
Ccajan14509	Soybean	Glyma12g00770.1	313	1e-36	92	1	64
Ccajan14511	Soybean	Glyma09g36600.1	785	3e-104	98	1	144
Ccajan14524	Soybean	Glyma06g03700.1	1180	7e-162	84	1	319
Ccajan14530	Soybean	Glyma10g35470.2	1464	0	89	1	347
Ccajan14563	Soybean	Glyma05g09100.2	2512	0	84	25	653
Ccajan14632	Soybean	Glyma01g05230.1	1317	0	92	1	283
Ccajan14657	Soybean	Glyma09g42140.2	834	3e-112	87	40	239
Ccajan14670	Soybean	Glyma10g29481.8	3049	0	81	31	761
Ccajan14709	Soybean	Glyma03g41270.1	109	2e-07	83	101	124
Ccajan14714	Soybean	Glyma05g31190.1	4815	0	84	14	1107
Ccajan14735	Soybean	Glyma18g45970.4	4051	0	93	1	822
Ccajan14841	Soybean	Glyma01g35145.1	1408	0	81	8	335
Ccajan14847	Soybean	Glyma18g04810.6	1114	9e-154	85	1	251
Ccajan1486	Soybean	Glyma13g41261.1	2789	0	83	9	657
Ccajan14888	Soybean	Glyma03g39990.1	1395	0	84	25	343
Ccajan14938	Soybean	Glyma19g29000.1	1186	7e-164	83	1	275
Ccajan14985	Soybean	Glyma08g41000.1	408	9e-52	96	10	93
Ccajan14997	Soybean	Glyma01g06150.1	1376	0	89	1	279
Ccajan15018	Soybean	Glyma08g03141.2	4378	0	83	17	1104
Ccajan1509	Soybean	Glyma04g39221.4	3095	0	82	1	714
Ccajan15173	Soybean	Glyma04g40121.1	665	5e-86	87	158	325
Ccajan15237	Soybean	Glyma11g08905.1	288	3e-33	82	67	136
Ccajan15342	Soybean	Glyma16g00950.2	2520	0	86	1	574
Ccajan15360	Soybean	Glyma15g41255.1	250	3e-27	98	1	46
Ccajan15486	Soybean	Glyma09g16790.1	1309	0	84	1	327
Ccajan15524	Soybean	Glyma11g04690.1	1413	0	81	1	349
Ccajan15569	Soybean	Glyma01g02880.2	300	2e-34	97	1	60
Ccajan15586	Soybean	Glyma05g33520.1	3208	0	84	1	710
Ccajan15610	Soybean	Glyma10g28820.2	1229	9e-170	86	1	287
Ccajan15613	Soybean	Glyma19g02090.1	1422	0	85	1	344
Ccajan15737	Soybean	Glyma04g12830.3	3479	0	88	1	761
Ccajan15855	Soybean	Glyma04g38560.1	1386	0	90	1	290
Ccajan15895	Soybean	Glyma14g10180.1	2054	0	91	1	423
Ccajan15906	Soybean	Glyma18g53440.1	1296	8e-180	84	1	301
Ccajan15938	Soybean	Glyma03g36070.1	1364	0	82	369	679
Ccajan16053	Soybean	Glyma01g22530.4	1445	0	83	1	376
Ccajan16069	Soybean	Glyma17g37710.1	1648	0	86	1	417
Ccajan16073	Soybean	Glyma05g28460.1	388	5e-45	96	1	74
Ccajan16087	Soybean	Glyma17g08861.1	314	1e-35	100	1	61
Ccajan16100	Soybean	Glyma16g27280.1	2407	0	87	1	521
Ccajan16112	Soybean	Glyma07g32374.2	2476	0	96	1	477
Ccajan16117	Soybean	Glyma16g03480.1	478	3e-60	81	1	125
Ccajan16131	Soybean	Glyma05g33600.1	594	3e-78	84	1	135
Ccajan16169	Soybean	Glyma09g03690.1	1191	1e-162	81	1	338
Ccajan16173	Soybean	Glyma01g02610.2	1321	0	85	1	337
Ccajan16231	Soybean	Glyma07g05500.1	1279	1e-175	84	49	380
Ccajan16239	Soybean	Glyma0005s50.2	926	1e-121	86	1	225
Ccajan16245	Soybean	Glyma12g33430.1	702	3e-88	81	19	219
Ccajan16245	Soybean	Glyma12g33430.1	544	1e-64	91	330	441
Ccajan16286	Soybean	Glyma20g37900.1	1702	0	83	87	529
Ccajan16394	Soybean	Glyma07g13611.1	283	4e-32	96	131	184
Ccajan16456	Soybean	Glyma13g41660.1	3699	0	91	1	743
Ccajan16515	Soybean	Glyma12g02540.1	1007	5e-137	87	73	297
Ccajan16535	Soybean	Glyma10g35350.1	4513	0	81	425	1517
Ccajan16540	Soybean	Glyma05g01030.2	972	2e-131	81	1	245
Ccajan16546	Soybean	Glyma13g35550.1	1516	0	87	1	342
Ccajan16611	Soybean	Glyma13g18150.1	762	1e-101	85	1	211
Ccajan16649	Soybean	Glyma13g39090.2	1620	0	86	2	357
Ccajan16716	Soybean	Glyma18g13574.1	800	1e-106	91	1	160
Ccajan16718	Soybean	Glyma08g04760.6	1948	0	83	1	464
Ccajan16760	Soybean	Glyma16g00931.1	1167	7e-161	81	1	285
Ccajan16892	Soybean	Glyma18g45220.2	3074	0	84	1	798
Ccajan16915	Soybean	Glyma14g07710.1	2884	0	87	1	636
Ccajan16963	Soybean	Glyma06g12701.1	2780	0	92	1	600
Ccajan17047	Soybean	Glyma08g20550.2	1196	2e-164	82	1	300
Ccajan17258	Soybean	Glyma15g02531.1	1775	0	82	1	445
Ccajan17291	Soybean	Glyma15g07010.2	1703	0	86	1	389
Ccajan17318	Soybean	Glyma18g46630.1	3106	0	87	1	704
Ccajan17344	Soybean	Glyma14g38460.1	1543	0	90	23	362
Ccajan17385	Soybean	Glyma06g08660.1	4258	0	83	1	971
Ccajan17434	Soybean	Glyma06g20520.1	365	2e-45	82	1	90
Ccajan17442	Soybean	Glyma05g33850.2	1730	0	92	1	359
Ccajan17474	Soybean	Glyma13g05380.2	397	2e-50	89	1	89
Ccajan17627	Soybean	Glyma19g44660.1	1157	2e-159	85	1	281
Ccajan17658	Soybean	Glyma18g05050.1	1430	0	82	1	361
Ccajan17671	Soybean	Glyma12g10710.1	3790	0	97	1	727
Ccajan17718	Soybean	Glyma14g35560.1	1386	0	82	1	324
Ccajan17753	Soybean	Glyma06g41530.1	1574	0	95	17	353
Ccajan17761	Soybean	Glyma20g34560.1	608	8e-81	88	1	134
Ccajan17776	Soybean	Glyma12g10210.3	622	6e-82	85	12	148
Ccajan17789	Soybean	Glyma09g12820.1	756	2e-99	99	214	356
Ccajan17910	Soybean	Glyma07g33960.1	1040	3e-143	86	1	231
Ccajan17971	Soybean	Glyma08g12460.1	1109	5e-152	81	1	251
Ccajan17973	Soybean	Glyma20g36750.1	1600	0	84	1	403
Ccajan18108	Soybean	Glyma17g08980.1	998	1e-132	92	286	487
Ccajan18131	Soybean	Glyma07g01960.2	1587	0	88	63	409
Ccajan18172	Soybean	Glyma16g23840.1	3726	0	88	1	798
Ccajan18179	Soybean	Glyma11g36770.3	1736	0	82	1	393
Ccajan18218	Soybean	Glyma02g38710.1	1305	2e-177	90	1	262
Ccajan18240	Soybean	Glyma18g15970.1	1240	2e-172	98	38	279
Ccajan18242	Soybean	Glyma17g34601.2	924	1e-123	93	1	183
Ccajan18262	Soybean	Glyma15g00440.3	2972	0	87	1	630
Ccajan18274	Soybean	Glyma10g04250.1	406	2e-51	85	1	87
Ccajan18284	Soybean	Glyma07g15240.1	1523	0	86	1	359
Ccajan18360	Soybean	Glyma01g22260.1	1576	0	82	24	384
Ccajan18378	Soybean	Glyma19g38800.6	1325	0	83	1	322
Ccajan18401	Soybean	Glyma04g17330.2	1323	0	83	1	364
Ccajan1842	Soybean	Glyma07g36180.3	4595	0	86	1	1039
Ccajan18426	Soybean	Glyma02g47380.6	1324	0	83	1	307
Ccajan18430	Soybean	Glyma13g08740.2	1201	2e-164	84	5	316
Ccajan18579	Soybean	Glyma11g04880.2	1445	0	86	1	331
Ccajan18643	Soybean	Glyma01g09280.1	464	1e-57	94	1	88
Ccajan18666	Soybean	Glyma14g01990.2	3127	0	89	1	680
Ccajan18675	Soybean	Glyma20g30640.1	307	6e-33	96	105	160
Ccajan18703	Soybean	Glyma01g04890.1	1497	0	89	1	345
Ccajan18707	Soybean	Glyma12g32530.2	426	8e-52	85	1	87
Ccajan18866	Soybean	Glyma15g37220.2	588	3e-73	87	83	217
Ccajan18910	Soybean	Glyma08g17990.1	814	9e-111	92	11	177
Ccajan18969	Soybean	Glyma08g10550.2	3988	0	89	1	904
Ccajan18972	Soybean	Glyma08g40705.1	1193	1e-164	83	46	320
Ccajan19005	Soybean	Glyma02g10833.2	1792	0	82	29	460
Ccajan19044	Soybean	Glyma17g07860.1	882	2e-117	82	127	341
Ccajan19071	Soybean	Glyma12g29720.1	3062	0	86	1	700
Ccajan19084	Soybean	Glyma05g08496.1	1841	0	82	86	524
Ccajan19089	Soybean	Glyma15g10230.2	1417	0	87	1	352
Ccajan19151	Soybean	Glyma05g36970.1	1721	0	88	1	363
Ccajan19189	Soybean	Glyma08g15740.2	1272	9e-177	94	1	282
Ccajan19246	Soybean	Glyma08g21610.1	2155	0	88	1	462
Ccajan19246	Soybean	Glyma08g21610.1	1243	1e-158	96	548	792
Ccajan19269	Soybean	Glyma06g03200.1	2850	0	85	1	637
Ccajan19270	Soybean	Glyma06g03210.1	1944	0	88	1	447
Ccajan19287	Soybean	Glyma08g17140.1	1524	0	90	1	328
Ccajan19293	Soybean	Glyma10g35920.2	2039	0	84	1	465
Ccajan19333	Soybean	Glyma15g42380.1	1408	0	84	1	384
Ccajan19359	Soybean	Glyma10g38280.2	3869	0	96	15	765
Ccajan19493	Soybean	Glyma02g02250.1	404	4e-51	95	10	93
Ccajan19555	Soybean	Glyma15g41255.1	242	2e-26	93	1	46
Ccajan19599	Soybean	Glyma13g31090.1	368	3e-45	86	12	103
Ccajan19634	Soybean	Glyma01g08150.1	986	3e-135	94	1	211
Ccajan19657	Soybean	Glyma10g06080.3	3269	0	89	1	677
Ccajan19708	Soybean	Glyma05g07943.1	1376	0	82	1	376
Ccajan19765	Soybean	Glyma19g36421.1	1598	0	88	1	337
Ccajan19798	Soybean	Glyma09g37050.1	1541	0	82	4	363
Ccajan19861	Soybean	Glyma04g08320.4	1497	0	82	9	357
Ccajan19968	Soybean	Glyma12g32400.1	751	1e-100	90	1	189
Ccajan19997	Soybean	Glyma12g36660.3	1539	0	86	1	352
Ccajan20027	Soybean	Glyma14g08101.1	456	8e-59	85	1	97
Ccajan20076	Soybean	Glyma13g21330.1	1054	1e-145	91	1	219
Ccajan20093	Soybean	Glyma07g11372.1	1539	0	84	1	357
Ccajan20103	Soybean	Glyma10g07730.1	1732	0	81	165	594
Ccajan20140	Soybean	Glyma15g07500.1	2175	0	90	1	475
Ccajan20158	Soybean	Glyma01g40180.1	1022	2e-137	90	264	473
Ccajan20168	Soybean	Glyma15g15520.1	3004	0	85	1	670
Ccajan20199	Soybean	Glyma01g31480.1	3261	0	88	1	711
Ccajan20215	Soybean	Glyma11g05700.2	642	8e-85	88	31	177
Ccajan20313	Soybean	Glyma02g29518.1	1133	2e-154	86	21	318
Ccajan20326	Soybean	Glyma14g01010.1	1112	6e-150	85	1	255
Ccajan20338	Soybean	Glyma19g42460.1	1343	0	97	34	291
Ccajan20359	Soybean	Glyma04g32324.2	1208	4e-165	83	5	299
Ccajan20388	Soybean	Glyma06g45554.1	448	5e-56	87	2	93
Ccajan20392	Soybean	Glyma17g09380.3	429	2e-53	99	1	81
Ccajan20399	Soybean	Glyma13g34950.1	1572	0	85	5	352
Ccajan20403	Soybean	Glyma14g37330.1	3039	0	86	17	690
Ccajan20436	Soybean	Glyma03g01860.1	2073	0	92	92	517
Ccajan20453	Soybean	Glyma01g26650.1	1240	5e-171	86	84	350
Ccajan20463	Soybean	Glyma07g03500.1	716	1e-95	81	1	189
Ccajan20576	Soybean	Glyma04g39830.1	1060	1e-146	94	1	221
Ccajan20594	Soybean	Glyma05g32850.1	1116	2e-153	86	55	298
Ccajan20689	Soybean	Glyma01g33370.1	1133	6e-158	98	1	215
Ccajan20730	Soybean	Glyma19g40470.1	1084	1e-149	90	31	264
Ccajan20749	Soybean	Glyma04g07230.1	1314	0	83	1	322
Ccajan20769	Soybean	Glyma02g06550.3	1407	0	89	17	325
Ccajan20809	Soybean	Glyma14g38280.2	924	3e-125	89	8	249
Ccajan20824	Soybean	Glyma17g13260.1	526	1e-67	93	1	107
Ccajan20861	Soybean	Glyma14g39130.1	1810	0	82	1	436
Ccajan20889	Soybean	Glyma06g35561.1	565	2e-70	91	75	192
Ccajan20909	Soybean	Glyma16g13570.1	600	2e-78	93	52	191
Ccajan20936	Soybean	Glyma02g18210.1	380	9e-47	84	1	86
Ccajan20938	Soybean	Glyma16g13070.1	317	6e-37	100	1	61
Ccajan20956	Soybean	Glyma17g18640.2	314	4e-31	89	467	531
Ccajan20967	Soybean	Glyma18g43130.1	460	9e-58	88	1	100
Ccajan21017	Soybean	Glyma09g27610.2	785	6e-106	81	1	189
Ccajan21046	Soybean	Glyma11g17490.1	3078	0	86	4	745
Ccajan21063	Soybean	Glyma04g04030.2	1062	1e-146	88	1	228
Ccajan21294	Soybean	Glyma19g04326.1	143	3e-12	94	2	32
Ccajan21319	Soybean	Glyma07g06060.2	3162	0	84	1	715
Ccajan21330	Soybean	Glyma05g23840.1	1666	0	90	1	345
Ccajan21356	Soybean	Glyma13g03660.1	2948	0	88	1	618
Ccajan21415	Soybean	Glyma04g11040.1	1539	0	90	1	342
Ccajan21520	Soybean	Glyma16g13400.1	2262	0	85	3	510
Ccajan21543	Soybean	Glyma16g25250.1	350	1e-43	89	1	73
Ccajan21575	Soybean	Glyma01g00880.4	1996	0	96	1	388
Ccajan21635	Soybean	Glyma02g44860.2	1293	9e-177	82	1	355
Ccajan2165	Soybean	Glyma19g40440.2	2314	0	81	1	537
Ccajan21666	Soybean	Glyma07g02930.1	916	7e-126	90	1	194
Ccajan21672	Soybean	Glyma14g36930.5	1833	0	92	1	411
Ccajan21724	Soybean	Glyma15g03225.3	4302	0	87	1	956
Ccajan21775	Soybean	Glyma01g45650.2	2048	0	97	687	1076
Ccajan21816	Soybean	Glyma07g17660.1	1402	0	89	1	287
Ccajan21818	Soybean	Glyma09g37370.1	442	6e-57	97	1	92
Ccajan21851	Soybean	Glyma18g24443.1	726	6e-97	91	1	146
Ccajan21862	Soybean	Glyma09g02750.1	4268	0	94	1	846
Ccajan2194	Soybean	Glyma10g35940.1	2438	0	90	1	502
Ccajan21941	Soybean	Glyma09g34061.2	995	2e-129	90	1	206
Ccajan2196	Soybean	Glyma10g35920.2	2212	0	93	9	465
Ccajan22112	Soybean	Glyma20g24366.3	750	1e-96	100	53	184
Ccajan22156	Soybean	Glyma20g01450.1	620	2e-80	88	1	135
Ccajan22222	Soybean	Glyma11g18960.1	433	9e-55	91	2	92
Ccajan22226	Soybean	Glyma04g09000.2	4260	0	94	2	844
Ccajan22272	Soybean	Glyma12g34490.1	1717	0	81	4	456
Ccajan22285	Soybean	Glyma11g01640.1	706	3e-94	82	3	185
Ccajan22322	Soybean	Glyma04g41170.1	1191	3e-164	84	1	297
Ccajan22357	Soybean	Glyma03g29610.2	1462	0	83	79	436
Ccajan22396	Soybean	Glyma14g06140.1	732	5e-99	91	1	149
Ccajan22454	Soybean	Glyma03g02620.1	871	4e-117	85	34	251
Ccajan22495	Soybean	Glyma12g02050.3	1369	0	83	1	316
Ccajan22507	Soybean	Glyma01g23230.1	1792	0	87	11	429
Ccajan22519	Soybean	Glyma11g06980.1	2228	0	83	1	516
Ccajan22550	Soybean	Glyma02g01600.1	624	8e-83	81	1	149
Ccajan22596	Soybean	Glyma18g06530.1	787	1e-106	91	1	172
Ccajan22607	Soybean	Glyma11g04060.1	2345	0	85	1	551
Ccajan22608	Soybean	Glyma16g10620.1	2186	0	83	42	589
Ccajan22630	Soybean	Glyma13g11200.2	939	6e-124	88	1	186
Ccajan22634	Soybean	Glyma12g06010.1	2377	0	88	1	553
Ccajan22653	Soybean	Glyma09g02510.1	440	1e-55	82	64	170
Ccajan22658	Soybean	Glyma11g37480.5	1944	0	83	70	531
Ccajan22694	Soybean	Glyma18g07960.1	1497	0	86	1	326
Ccajan22763	Soybean	Glyma18g52410.1	656	6e-87	82	12	175
Ccajan22823	Soybean	Glyma15g18970.1	891	3e-121	83	25	228
Ccajan22915	Soybean	Glyma14g00240.2	3789	0	89	1	777
Ccajan22922	Soybean	Glyma09g06770.2	783	1e-105	93	1	158
Ccajan22937	Soybean	Glyma04g37391.1	736	5e-96	85	2	163
Ccajan22966	Soybean	Glyma11g05280.1	1097	9e-152	90	1	240
Ccajan23160	Soybean	Glyma20g23220.2	1163	2e-160	84	5	274
Ccajan23164	Soybean	Glyma18g03430.3	1331	0	84	1	299
Ccajan23189	Soybean	Glyma16g32580.2	1794	0	81	1	493
Ccajan23211	Soybean	Glyma15g18580.3	1795	0	83	70	527
Ccajan23229	Soybean	Glyma06g36140.1	663	2e-87	81	1	185
Ccajan23261	Soybean	Glyma13g32810.4	321	6e-38	97	1	63
Ccajan23262	Soybean	Glyma06g08390.2	1006	2e-137	86	1	236
Ccajan23313	Soybean	Glyma13g29510.1	315	1e-36	98	16	75
Ccajan23326	Soybean	Glyma10g26681.1	1152	3e-159	87	7	266
Ccajan23336	Soybean	Glyma15g24770.1	3015	0	86	1	674
Ccajan23353	Soybean	Glyma10g37780.1	2934	0	83	1	670
Ccajan23362	Soybean	Glyma13g01200.1	1676	0	91	1	362
Ccajan23375	Soybean	Glyma08g19300.1	907	2e-124	94	1	190
Ccajan23394	Soybean	Glyma15g41486.1	1084	9e-149	91	1	250
Ccajan23445	Soybean	Glyma08g40541.1	850	6e-113	82	6	231
Ccajan23510	Soybean	Glyma15g12320.1	2661	0	90	1	552
Ccajan23511	Soybean	Glyma06g21020.1	1525	0	83	1	357
Ccajan23570	Soybean	Glyma18g50371.1	1543	0	85	30	383
Ccajan23703	Soybean	Glyma08g24400.3	3276	0	92	1	656
Ccajan23703	Soybean	Glyma08g24400.3	357	2e-34	82	725	819
Ccajan23707	Soybean	Glyma08g40831.1	784	5e-103	90	1	181
Ccajan23751	Soybean	Glyma17g09380.3	910	1e-124	93	1	188
Ccajan23758	Soybean	Glyma18g07250.1	1431	0	86	5	321
Ccajan23784	Soybean	Glyma04g34720.1	564	3e-71	87	16	159
Ccajan23803	Soybean	Glyma02g11900.1	1852	0	87	2	442
Ccajan23822	Soybean	Glyma10g40360.2	1480	0	82	1	355
Ccajan23853	Soybean	Glyma20g32750.1	1258	4e-175	86	1	274
Ccajan23857	Soybean	Glyma11g07990.4	786	4e-104	97	1	145
Ccajan23869	Soybean	Glyma14g24590.1	719	4e-96	94	1	149
Ccajan23895	Soybean	Glyma01g45070.1	3406	0	89	1	725
Ccajan24009	Soybean	Glyma03g17450.1	2225	0	89	155	647
Ccajan24009	Soybean	Glyma03g17450.1	373	2e-37	89	10	85
Ccajan24048	Soybean	Glyma14g33800.1	1732	0	88	14	370
Ccajan24070	Soybean	Glyma10g21950.1	3026	0	86	2	710
Ccajan24084	Soybean	Glyma09g25230.2	4237	0	82	1	990
Ccajan24092	Soybean	Glyma17g15380.1	1283	3e-178	90	2	299
Ccajan24129	Soybean	Glyma19g37670.1	803	2e-107	89	1	186
Ccajan24149	Soybean	Glyma08g02080.1	1464	0	89	1	321
Ccajan24177	Soybean	Glyma05g38430.5	1631	0	94	1	317
Ccajan24186	Soybean	Glyma04g05500.5	1618	0	85	12	372
Ccajan24421	Soybean	Glyma12g06180.2	1433	0	85	1	334
Ccajan24585	Soybean	Glyma16g03190.1	1932	0	86	1	424
Ccajan24672	Soybean	Glyma01g38390.1	875	7e-119	86	1	214
Ccajan24694	Soybean	Glyma17g36500.2	929	3e-126	84	1	243
Ccajan24754	Soybean	Glyma02g38091.3	314	2e-37	92	1	66
Ccajan24789	Soybean	Glyma14g13470.1	765	1e-102	84	1	194
Ccajan24876	Soybean	Glyma19g29610.2	2138	0	84	1	483
Ccajan24932	Soybean	Glyma01g39520.3	1396	0	84	1	366
Ccajan24932	Soybean	Glyma01g39520.3	297	6e-29	92	437	502
Ccajan25006	Soybean	Glyma08g03590.1	1476	0	92	1	301
Ccajan25007	Soybean	Glyma07g37220.1	3011	0	92	1	622
Ccajan25046	Soybean	Glyma16g34350.1	3563	0	94	1	718
Ccajan25065	Soybean	Glyma18g49101.1	1345	0	89	109	392
Ccajan25089	Soybean	Glyma18g49830.1	1905	0	86	1	427
Ccajan25116	Soybean	Glyma04g04200.1	1624	0	90	1	362
Ccajan25127	Soybean	Glyma10g00380.1	1764	0	98	1	327
Ccajan25178	Soybean	Glyma01g29760.1	1021	2e-139	88	26	270
Ccajan25288	Soybean	Glyma07g37840.2	586	8e-78	88	1	121
Ccajan2509	Soybean	Glyma16g01020.1	2316	0	84	1	543
Ccajan25364	Soybean	Glyma15g34770.1	788	3e-103	86	16	188
Ccajan25439	Soybean	Glyma20g04400.2	1278	8e-178	86	4	278
Ccajan25481	Soybean	Glyma12g33460.1	1468	0	96	1	279
Ccajan25534	Soybean	Glyma12g14400.1	1246	1e-173	93	1	258
Ccajan25652	Soybean	Glyma18g32560.1	2229	0	86	1	539
Ccajan25673	Soybean	Glyma19g34881.1	768	4e-102	87	1	146
Ccajan25719	Soybean	Glyma02g12830.1	1185	2e-163	82	2	285
Ccajan25760	Soybean	Glyma13g02170.1	486	2e-60	95	1	97
Ccajan25820	Soybean	Glyma01g39600.1	1349	0	85	1	321
Ccajan25846	Soybean	Glyma09g33730.2	2612	0	84	85	731
Ccajan25855	Soybean	Glyma20g33480.1	1226	3e-168	81	1	327
Ccajan25882	Soybean	Glyma19g34650.1	424	3e-53	81	1	119
Ccajan25932	Soybean	Glyma13g05380.2	389	4e-49	87	1	89
Ccajan25979	Soybean	Glyma11g14750.2	3188	0	81	1	742
Ccajan26037	Soybean	Glyma01g41610.2	855	1e-116	90	1	182
Ccajan26100	Soybean	Glyma13g18620.2	1253	6e-174	89	1	291
Ccajan26123	Soybean	Glyma08g06040.2	4506	0	84	1	1043
Ccajan26263	Soybean	Glyma14g08641.1	2528	0	85	29	583
Ccajan26443	Soybean	Glyma13g38910.1	2673	0	85	66	702
Ccajan26488	Soybean	Glyma11g34990.2	804	3e-109	87	1	179
Ccajan26527	Soybean	Glyma07g05960.1	679	5e-89	91	1	137
Ccajan26541	Soybean	Glyma15g03440.1	1271	8e-177	93	38	291
Ccajan26544	Soybean	Glyma13g02170.1	493	2e-61	94	1	99
Ccajan26562	Soybean	Glyma16g32540.2	308	1e-35	97	1	61
Ccajan26570	Soybean	Glyma10g43190.1	1003	2e-137	83	1	246
Ccajan26629	Soybean	Glyma12g36630.1	511	4e-64	94	1	98
Ccajan26673	Soybean	Glyma07g04160.1	1465	0	84	297	648
Ccajan26689	Soybean	Glyma04g05080.2	2815	0	82	1	663
Ccajan26722	Soybean	Glyma01g34523.1	518	3e-66	93	1	102
Ccajan26761	Soybean	Glyma12g14130.1	1192	4e-163	81	1	330
Ccajan26816	Soybean	Glyma12g05250.2	1794	0	87	22	430
Ccajan26869	Soybean	Glyma18g47741.1	1127	4e-149	85	499	744
Ccajan26937	Soybean	Glyma03g41980.5	968	9e-132	81	11	256
Ccajan26942	Soybean	Glyma15g10830.1	3726	0	91	1	762
Ccajan26959	Soybean	Glyma08g04661.1	429	5e-53	95	110	194
Ccajan26968	Soybean	Glyma08g05220.6	1671	0	83	1	364
Ccajan26983	Soybean	Glyma20g29710.1	452	3e-56	96	1	89
Ccajan26989	Soybean	Glyma01g37470.3	849	8e-115	87	1	182
Ccajan27121	Soybean	Glyma15g28410.2	2473	0	85	1	549
Ccajan27174	Soybean	Glyma10g03690.1	732	3e-97	97	139	282
Ccajan27204	Soybean	Glyma20g24290.1	712	2e-92	96	1	134
Ccajan27260	Soybean	Glyma02g17260.1	2186	0	91	1	471
Ccajan27287	Soybean	Glyma13g39370.1	771	1e-102	97	174	319
Ccajan27332	Soybean	Glyma12g07560.1	1021	7e-133	88	1	228
Ccajan27336	Soybean	Glyma0041s00360.1	815	2e-109	99	140	291
Ccajan27355	Soybean	Glyma15g13150.1	3368	0	94	1	668
Ccajan27400	Soybean	Glyma13g30800.4	549	2e-69	86	13	129
Ccajan27471	Soybean	Glyma06g09670.1	559	1e-70	89	112	248
Ccajan27487	Soybean	Glyma02g01740.1	221	1e-22	93	1	44
Ccajan27547	Soybean	Glyma14g06870.2	1767	0	84	1	393
Ccajan27577	Soybean	Glyma04g10185.3	762	2e-97	90	88	248
Ccajan27703	Soybean	Glyma11g02400.1	1427	0	88	1	325
Ccajan27728	Soybean	Glyma02g18210.1	360	9e-45	85	1	78
Ccajan27792	Soybean	Glyma04g33640.1	440	1e-56	96	1	89
Ccajan27892	Soybean	Glyma08g01450.2	1655	0	85	1	396
Ccajan27910	Soybean	Glyma17g09710.2	1350	0	81	1	330
Ccajan27922	Soybean	Glyma17g07420.1	1627	0	87	1	374
Ccajan27979	Soybean	Glyma05g02300.2	1966	0	81	5	454
Ccajan28016	Soybean	Glyma13g03700.1	2974	0	90	8	621
Ccajan28019	Soybean	Glyma01g26650.1	331	1e-37	82	1	89
Ccajan28057	Soybean	Glyma10g11985.1	1655	0	90	132	471
Ccajan28109	Soybean	Glyma09g41470.1	483	1e-61	94	28	128
Ccajan28192	Soybean	Glyma11g11791.1	2411	0	87	1	557
Ccajan28212	Soybean	Glyma12g32610.1	1351	0	83	1	328
Ccajan28282	Soybean	Glyma16g04740.1	1572	0	86	1	352
Ccajan28294	Soybean	Glyma10g36360.1	2022	0	85	1	438
Ccajan28408	Soybean	Glyma18g07330.1	1617	0	85	1	382
Ccajan28448	Soybean	Glyma06g43890.3	2247	0	88	1	478
Ccajan28506	Soybean	Glyma19g34220.2	940	1e-125	92	1	190
Ccajan28514	Soybean	Glyma12g32541.1	534	3e-67	86	34	146
Ccajan28569	Soybean	Glyma11g07310.1	370	4e-46	84	1	85
Ccajan28582	Soybean	Glyma09g01540.1	3532	0	93	1	691
Ccajan28584	Soybean	Glyma19g26400.1	760	3e-102	82	1	188
Ccajan28697	Soybean	Glyma04g06240.1	1381	0	92	1	309
Ccajan28742	Soybean	Glyma20g36770.2	760	2e-100	87	145	331
Ccajan28746	Soybean	Glyma19g07830.1	1119	6e-154	87	1	273
Ccajan28755	Soybean	Glyma05g08870.2	709	5e-95	87	1	170
Ccajan28778	Soybean	Glyma10g02480.1	662	1e-88	84	1	145
Ccajan28818	Soybean	Glyma18g12590.2	333	2e-38	91	12	79
Ccajan28875	Soybean	Glyma12g06630.2	3167	0	87	1	687
Ccajan28891	Soybean	Glyma18g10290.1	813	2e-109	86	1	212
Ccajan28963	Soybean	Glyma05g35050.1	1303	1e-180	82	1	316
Ccajan2901	Soybean	Glyma12g32050.3	3735	0	95	1	779
Ccajan29026	Soybean	Glyma08g09780.3	1322	0	92	1	279
Ccajan29046	Soybean	Glyma03g35570.1	179	3e-17	90	113	152
Ccajan29120	Soybean	Glyma02g09050.1	276	4e-29	84	44	103
Ccajan29164	Soybean	Glyma15g43030.1	3303	0	90	1	722
Ccajan29170	Soybean	Glyma08g28880.1	1462	0	88	1	326
Ccajan29347	Soybean	Glyma07g39820.1	922	1e-125	83	1	223
Ccajan29348	Soybean	Glyma15g36310.2	876	6e-119	88	1	212
Ccajan29370	Soybean	Glyma12g01730.1	1489	0	88	4	333
Ccajan29450	Soybean	Glyma13g30710.1	993	3e-135	81	1	242
Ccajan29505	Soybean	Glyma04g35850.2	496	5e-62	85	150	278
Ccajan2953	Soybean	Glyma01g35500.2	3304	0	94	1	656
Ccajan29553	Soybean	Glyma05g01060.1	378	1e-47	91	1	79
Ccajan29677	Soybean	Glyma14g07260.2	1017	6e-140	88	13	231
Ccajan29731	Soybean	Glyma19g14270.1	494	5e-63	88	92	206
Ccajan29761	Soybean	Glyma12g02740.1	1071	2e-146	85	1	275
Ccajan29768	Soybean	Glyma09g14880.1	883	5e-119	91	1	200
Ccajan29821	Soybean	Glyma13g18131.1	2481	0	92	1	505
Ccajan29845	Soybean	Glyma15g09280.1	1681	0	81	2	392
Ccajan29908	Soybean	Glyma11g11450.1	1101	5e-152	88	1	246
Ccajan29927	Soybean	Glyma19g26735.1	2459	0	85	118	680
Ccajan29996	Soybean	Glyma16g31280.1	1358	0	88	1	291
Ccajan30173	Soybean	Glyma18g49360.1	1404	0	89	1	334
Ccajan30177	Soybean	Glyma03g02920.1	1543	0	91	1	329
Ccajan30183	Soybean	Glyma12g01630.1	155	2e-13	92	770	805
Ccajan30267	Soybean	Glyma13g35000.1	362	8e-43	84	1	112
Ccajan30289	Soybean	Glyma06g35660.1	847	1e-112	92	1	164
Ccajan30295	Soybean	Glyma16g00920.1	1036	1e-141	81	1	269
Ccajan30317	Soybean	Glyma02g44110.1	1700	0	83	1	373
Ccajan30375	Soybean	Glyma16g32620.1	1016	3e-139	81	1	246
Ccajan30473	Soybean	Glyma08g04661.1	836	1e-112	82	1	194
Ccajan30662	Soybean	Glyma09g03390.4	1139	2e-155	87	1	240
Ccajan30765	Soybean	Glyma17g18580.1	575	1e-75	81	1	143
Ccajan30807	Soybean	Glyma18g53954.1	940	2e-128	83	1	228
Ccajan30831	Soybean	Glyma20g22986.2	221	5e-23	89	264	307
Ccajan30856	Soybean	Glyma05g31800.1	384	1e-43	93	83	162
Ccajan30863	Soybean	Glyma09g32300.1	1209	2e-166	81	15	320
Ccajan30956	Soybean	Glyma04g35650.1	1265	2e-174	83	38	344
Ccajan3103	Soybean	Glyma05g22140.1	2045	0	84	1	480
Ccajan31037	Soybean	Glyma10g35481.1	2642	0	84	1	612
Ccajan31256	Soybean	Glyma13g27455.1	1025	4e-138	89	209	422
Ccajan31373	Soybean	Glyma02g07790.1	295	1e-30	95	38	95
Ccajan31441	Soybean	Glyma18g04500.1	1943	0	90	166	576
Ccajan31563	Soybean	Glyma17g15330.1	1091	3e-149	93	99	333
Ccajan31656	Soybean	Glyma03g33640.1	437	3e-56	97	1	89
Ccajan31674	Soybean	Glyma01g37393.1	1215	9e-156	89	1116	1368
Ccajan31734	Soybean	Glyma0041s00360.1	686	8e-90	89	140	291
Ccajan31752	Soybean	Glyma13g30860.1	933	4e-115	89	1	226
Ccajan31856	Soybean	Glyma05g32680.1	933	9e-128	87	3	207
Ccajan31894	Soybean	Glyma19g01300.1	1193	2e-165	91	31	284
Ccajan31927	Soybean	Glyma18g39740.1	440	2e-51	92	1	93
Ccajan31957	Soybean	Glyma11g36890.2	302	2e-35	95	1	61
Ccajan32377	Soybean	Glyma06g04490.3	673	5e-90	86	1	159
Ccajan32383	Soybean	Glyma11g14700.1	1308	2e-177	83	337	614
Ccajan3242	Soybean	Glyma20g29960.2	4596	0	87	1	991
Ccajan32512	Soybean	Glyma20g36600.2	3217	0	97	1	631
Ccajan32836	Soybean	Glyma08g12730.2	392	1e-47	96	1	76
Ccajan32995	Soybean	Glyma05g32410.2	963	6e-131	81	20	266
Ccajan33018	Soybean	Glyma08g01430.1	524	7e-68	81	20	147
Ccajan33031	Soybean	Glyma09g07990.1	1483	0	86	2	363
Ccajan33040	Soybean	Glyma13g21350.1	1616	0	85	40	453
Ccajan33082	Soybean	Glyma17g14180.1	744	6e-99	97	146	288
Ccajan33122	Soybean	Glyma12g29280.3	910	1e-116	89	122	307
Ccajan33140	Soybean	Glyma14g36370.1	1452	0	86	1	336
Ccajan33206	Soybean	Glyma13g34170.1	1048	1e-142	96	80	325
Ccajan3324	Soybean	Glyma20g00900.1	4387	0	86	1	1009
Ccajan33240	Soybean	Glyma02g07790.1	468	3e-56	91	1	95
Ccajan33350	Soybean	Glyma12g06880.2	1157	2e-159	86	57	307
Ccajan33377	Soybean	Glyma06g17480.1	1007	2e-137	86	22	269
Ccajan33459	Soybean	Glyma05g26490.1	1808	0	81	13	475
Ccajan33574	Soybean	Glyma09g00685.1	570	9e-73	85	33	156
Ccajan3364	Soybean	Glyma15g03650.1	2625	0	86	10	590
Ccajan33861	Soybean	Glyma02g29360.1	1034	1e-141	94	69	295
Ccajan34025	Soybean	Glyma03g14440.1	707	4e-93	94	1	143
Ccajan34109	Soybean	Glyma11g37920.5	699	7e-92	91	1	148
Ccajan34126	Soybean	Glyma18g39970.2	622	2e-80	82	1	145
Ccajan34218	Soybean	Glyma13g32810.6	290	7e-35	93	1	60
Ccajan34225	Soybean	Glyma16g06900.1	1221	2e-169	85	1	276
Ccajan34410	Soybean	Glyma04g06650.1	847	3e-107	87	31	227
Ccajan34410	Soybean	Glyma04g06650.1	198	1e-16	81	1	43
Ccajan34573	Soybean	Glyma06g05430.9	1726	0	91	162	511
Ccajan34630	Soybean	Glyma12g32130.4	336	2e-41	92	1	73
Ccajan34652	Soybean	Glyma06g45520.1	934	4e-127	83	1	235
Ccajan34697	Soybean	Glyma01g43700.1	1593	0	87	1	356
Ccajan34814	Soybean	Glyma08g15210.2	839	2e-114	89	1	177
Ccajan34834	Soybean	Glyma04g01410.2	394	8e-50	82	1	87
Ccajan35011	Soybean	Glyma20g31551.2	822	6e-110	100	8	156
Ccajan35026	Soybean	Glyma13g30800.4	863	5e-115	82	128	332
Ccajan35078	Soybean	Glyma12g29021.1	2827	0	93	1	636
Ccajan35118	Soybean	Glyma02g47470.1	291	2e-31	81	20	93
Ccajan35132	Soybean	Glyma14g07280.2	401	8e-51	91	1	87
Ccajan35181	Soybean	Glyma12g14101.1	909	2e-124	87	2	198
Ccajan35237	Soybean	Glyma11g13610.1	947	2e-128	87	15	220
Ccajan35351	Soybean	Glyma18g04760.1	1041	4e-143	91	1	239
Ccajan35427	Soybean	Glyma13g39160.1	1031	4e-141	81	1	253
Ccajan35775	Soybean	Glyma19g30230.1	1254	3e-173	86	1	294
Ccajan35862	Soybean	Glyma03g02920.1	1374	0	90	1	296
Ccajan3588	Soybean	Glyma11g06620.4	5216	0	83	268	1445
Ccajan35940	Soybean	Glyma19g40390.1	639	3e-85	92	12	150
Ccajan3609	Soybean	Glyma12g32350.1	2280	0	92	1	460
Ccajan3628	Soybean	Glyma15g03850.1	2068	0	92	14	447
Ccajan36373	Soybean	Glyma03g02620.1	430	1e-52	83	34	122
Ccajan36455	Soybean	Glyma07g15710.2	766	1e-102	81	1	210
Ccajan3685	Soybean	Glyma01g25710.2	2550	0	89	1	609
Ccajan37034	Soybean	Glyma05g03660.4	309	3e-35	98	1	61
Ccajan37173	Soybean	Glyma04g17885.3	450	5e-55	88	233	332
Ccajan37200	Soybean	Glyma12g36630.1	957	1e-129	89	97	315
Ccajan3726	Soybean	Glyma14g01020.1	2760	0	94	1	545
Ccajan37270	Soybean	Glyma15g11850.1	768	1e-101	97	229	375
Ccajan37354	Soybean	Glyma12g13710.1	856	2e-115	90	105	284
Ccajan37547	Soybean	Glyma12g10790.1	335	2e-41	90	1	73
Ccajan37572	Soybean	Glyma05g02110.2	813	4e-110	84	5	190
Ccajan37726	Soybean	Glyma20g39160.1	1150	1e-158	90	45	297
Ccajan37776	Soybean	Glyma19g44570.2	1008	5e-133	84	377	607
Ccajan37957	Soybean	Glyma17g08300.3	108	3e-06	81	53	78
Ccajan38005	Soybean	Glyma04g13660.2	785	3e-104	97	1	145
Ccajan38126	Soybean	Glyma02g16670.2	1414	0	87	343	653
Ccajan38394	Soybean	Glyma01g10610.1	1021	2e-137	83	1	265
Ccajan38559	Soybean	Glyma08g11110.1	297	2e-34	81	1	68
Ccajan38710	Soybean	Glyma01g37961.1	331	7e-41	87	1	69
Ccajan38782	Soybean	Glyma01g38360.1	387	3e-44	84	350	445
Ccajan38786	Soybean	Glyma14g39260.2	446	3e-53	92	298	392
Ccajan38912	Soybean	Glyma07g31220.1	583	3e-74	90	1	120
Ccajan38974	Soybean	Glyma19g02580.1	311	4e-35	97	1	59
Ccajan3931	Soybean	Glyma08g13110.1	3851	0	85	1	849
Ccajan39467	Soybean	Glyma15g17090.1	563	5e-74	81	1	131
Ccajan39617	Soybean	Glyma08g44140.1	558	6e-73	99	1	105
Ccajan40210	Soybean	Glyma02g07790.1	451	3e-54	88	1	95
Ccajan40217	Soybean	Glyma08g01280.1	343	9e-41	97	1	61
Ccajan40589	Soybean	Glyma02g00820.1	468	8e-59	97	1	87
Ccajan40666	Soybean	Glyma19g34590.1	509	2e-65	96	1	102
Ccajan41284	Soybean	Glyma01g06181.1	446	3e-55	91	1	88
Ccajan4164	Soybean	Glyma17g08170.1	2029	0	81	1	505
Ccajan43283	Soybean	Glyma09g33451.1	290	5e-33	100	1	60
Ccajan44027	Soybean	Glyma19g44570.2	1046	1e-138	87	377	607
Ccajan45191	Soybean	Glyma10g32410.1	488	3e-61	96	1	92
Ccajan45255	Soybean	Glyma05g26780.2	734	2e-95	99	43	177
Ccajan45576	Soybean	Glyma02g09140.1	196	1e-19	93	178	221
Ccajan47586	Soybean	Glyma09g02770.1	413	8e-51	95	62	149
Ccajan47792	Soybean	Glyma20g36600.3	522	3e-62	88	1	106
Ccajan9808	Soybean	Glyma17g05220.1	4579	0	91	1	1136
Ccajan5984	Soybean	Glyma10g01211.1	4556	0	87	1	993
Ccajan5833	Soybean	Glyma17g04310.2	4534	0	86	1	997
Ccajan8547	Soybean	Glyma05g28090.3	4407	0	86	1	976
Ccajan9847	Soybean	Glyma10g30870.1	4366	0	88	1	957
Ccajan9697	Soybean	Glyma07g15640.1	4346	0	90	108	1110
Ccajan4643	Soybean	Glyma14g03650.1	4293	0	91	1	896
Ccajan8922	Soybean	Glyma20g11710.1	4076	0	91	1	827
Ccajan8009	Soybean	Glyma04g37020.2	4057	0	88	19	888
Ccajan6501	Soybean	Glyma17g02741.3	4043	0	81	207	1174
Ccajan6440	Soybean	Glyma10g38320.1	3944	0	87	1	859
Ccajan4718	Soybean	Glyma06g02030.5	3821	0	84	1	909
Ccajan9466	Soybean	Glyma11g09400.1	3757	0	89	1	786
Ccajan4763	Soybean	Glyma15g09750.3	3694	0	86	15	867
Ccajan8417	Soybean	Glyma11g31234.1	3594	0	83	98	898
Ccajan9502	Soybean	Glyma15g13160.2	3531	0	94	24	706
Ccajan5751	Soybean	Glyma07g02220.1	3328	0	85	1	750
Ccajan9665	Soybean	Glyma03g31876.2	3322	0	83	1	756
Ccajan5078	Soybean	Glyma06g00461.2	3245	0	87	1	691
Ccajan6968	Soybean	Glyma07g32300.2	3185	0	85	1	704
Ccajan7541	Soybean	Glyma12g08110.1	3021	0	83	1	701
Ccajan9899	Soybean	Glyma10g10040.2	2996	0	89	1	661
Ccajan9176	Soybean	Glyma08g01810.1	2817	0	85	1	609
Ccajan6513	Soybean	Glyma13g09220.1	2588	0	87	1	591
Ccajan5580	Soybean	Glyma01g12740.1	2530	0	82	1	634
Ccajan6261	Soybean	Glyma19g26735.1	2474	0	86	118	680
Ccajan8204	Soybean	Glyma13g18680.1	2319	0	86	17	525
Ccajan9696	Soybean	Glyma18g41280.1	2305	0	81	4	572
Ccajan5134	Soybean	Glyma05g27670.3	2303	0	89	24	512
Ccajan7053	Soybean	Glyma11g10170.4	2302	0	94	2	455
Ccajan8541	Soybean	Glyma14g40580.1	2285	0	86	1	559
Ccajan5798	Soybean	Glyma13g21371.1	2253	0	92	1	487
Ccajan6830	Soybean	Glyma20g03230.2	2233	0	83	1	538
Ccajan4846	Soybean	Glyma13g36960.1	2210	0	87	5	474
Ccajan6964	Soybean	Glyma02g06530.1	2196	0	81	1	523
Ccajan6318	Soybean	Glyma18g39740.1	2179	0	89	90	554
Ccajan5161	Soybean	Glyma05g22460.2	2172	0	87	1	499
Ccajan6638	Soybean	Glyma13g00950.1	2158	0	82	1	528
Ccajan6985	Soybean	Glyma18g00840.2	2154	0	83	403	962
Ccajan8527	Soybean	Glyma08g25050.1	2154	0	85	1	506
Ccajan4333	Soybean	Glyma19g39640.2	2138	0	86	66	535
Ccajan5886	Soybean	Glyma18g06360.2	2113	0	81	1	542
Ccajan8856	Soybean	Glyma09g38581.1	2101	0	82	1	499
Ccajan4892	Soybean	Glyma11g10170.4	2012	0	82	2	455
Ccajan5138	Soybean	Glyma10g07940.3	2005	0	89	35	465
Ccajan2053	Soybean	Glyma01g44330.1	1992	0	84	1	459
Ccajan5327	Soybean	Glyma05g29470.1	1959	0	89	1	402
Ccajan3230	Soybean	Glyma20g32480.1	1939	0	81	61	559
Ccajan7166	Soybean	Glyma20g32690.2	1932	0	86	21	442
Ccajan3711	Soybean	Glyma11g10220.1	1929	0	89	1	434
Ccajan1271	Soybean	Glyma02g00960.2	1925	0	89	1	434
Ccajan6251	Soybean	Glyma11g37390.2	1905	0	92	98	470
Ccajan3432	Soybean	Glyma18g00903.1	1893	0	86	1	433
Ccajan6248	Soybean	Glyma13g11592.2	1882	0	88	1	394
Ccajan7532	Soybean	Glyma08g16190.1	1875	0	82	1	450
Ccajan5340	Soybean	Glyma07g01611.1	1864	0	84	1	431
Ccajan1720	Soybean	Glyma13g42100.1	1863	0	83	1	443
Ccajan9471	Soybean	Glyma08g16910.5	1819	0	86	1	423
Ccajan7844	Soybean	Glyma06g03630.2	1801	0	82	1	468
Ccajan7921	Soybean	Glyma17g00650.2	1798	0	84	1	403
Ccajan5802	Soybean	Glyma15g41825.1	1759	0	93	1	347
Ccajan1572	Soybean	Glyma10g42280.1	1745	0	87	39	456
Ccajan0205	Soybean	Glyma04g04170.1	1743	0	85	1	417
Ccajan9361	Soybean	Glyma19g26390.1	1743	0	91	1	365
Ccajan3246	Soybean	Glyma18g05880.2	1737	0	89	1	380
Ccajan0606	Soybean	Glyma12g09490.2	1733	0	85	18	404
Ccajan1313	Soybean	Glyma12g34990.1	1721	0	88	1	375
Ccajan3354	Soybean	Glyma05g30170.5	1721	0	89	1	375
Ccajan5717	Soybean	Glyma11g04441.1	1704	0	89	1	362
Ccajan2572	Soybean	Glyma02g11781.2	1685	0	89	1	424
Ccajan4299	Soybean	Glyma05g35151.1	1677	0	91	1	365
Ccajan7467	Soybean	Glyma19g41250.1	1656	0	83	1	434
Ccajan8835	Soybean	Glyma09g34170.1	1639	0	92	70	414
Ccajan4029	Soybean	Glyma13g18805.4	1627	0	85	1	353
Ccajan4127	Soybean	Glyma18g49520.1	1627	0	89	149	501
Ccajan8411	Soybean	Glyma10g36980.1	1625	0	81	63	443
Ccajan0930	Soybean	Glyma13g05690.2	1605	0	84	21	412
Ccajan3312	Soybean	Glyma13g16924.1	1581	0	85	1	384
Ccajan2274	Soybean	Glyma13g36840.3	1579	0	91	1	344
Ccajan8421	Soybean	Glyma01g02390.1	1557	0	93	1	334
Ccajan6449	Soybean	Glyma19g34210.1	1557	0	87	1	370
Ccajan0956	Soybean	Glyma15g40510.1	1544	0	94	1	303
Ccajan5988	Soybean	Glyma07g30140.1	1534	0	85	31	355
Ccajan4168	Soybean	Glyma19g44380.1	1526	0	82	1	362
Ccajan1139	Soybean	Glyma15g03350.3	1523	0	91	1	347
Ccajan1432	Soybean	Glyma06g47380.1	1520	0	90	1	319
Ccajan9543	Soybean	Glyma13g32650.2	1511	0	90	18	348
Ccajan1393	Soybean	Glyma07g04290.1	1498	0	88	3	345
Ccajan4096	Soybean	Glyma20g32770.1	1485	0	84	13	381
Ccajan3277	Soybean	Glyma05g00930.2	1483	0	84	12	350
Ccajan8249	Soybean	Glyma04g43411.2	1479	0	81	3	353
Ccajan9165	Soybean	Glyma12g05930.3	1478	0	81	11	400
Ccajan5164	Soybean	Glyma05g22970.2	1476	0	82	1	393
Ccajan3626	Soybean	Glyma15g03830.1	1475	0	86	1	341
Ccajan0370	Soybean	Glyma18g07890.2	1467	0	95	1	301
Ccajan4517	Soybean	Glyma03g35010.3	1461	0	83	1	384
Ccajan3200	Soybean	Glyma06g05260.1	1455	0	84	1	354
Ccajan0011	Soybean	Glyma05g35610.2	1454	0	88	15	346
Ccajan5025	Soybean	Glyma09g33870.1	1450	0	81	1	352
Ccajan7313	Soybean	Glyma03g29825.1	1449	0	94	137	442
Ccajan5980	Soybean	Glyma15g02955.1	1446	0	87	1	353
Ccajan5492	Soybean	Glyma05g07980.1	1420	0	93	1	307
Ccajan0208	Soybean	Glyma10g41531.1	1417	0	82	58	417
Ccajan8114	Soybean	Glyma09g02040.2	1407	0	91	51	343
Ccajan7985	Soybean	Glyma09g30040.4	1398	0	93	1	282
Ccajan7986	Soybean	Glyma09g30040.4	1392	0	93	1	282
Ccajan1231	Soybean	Glyma04g41710.1	1378	0	87	1	329
Ccajan5535	Soybean	Glyma20g37550.1	1374	0	83	1	328
Ccajan8360	Soybean	Glyma15g40950.1	1371	0	84	1	318
Ccajan8853	Soybean	Glyma18g14750.1	1369	0	89	23	326
Ccajan9122	Soybean	Glyma14g06750.1	1367	0	88	3	288
Ccajan3379	Soybean	Glyma19g32051.2	1367	0	81	340	658
Ccajan0468	Soybean	Glyma06g35330.1	1357	0	89	1	302
Ccajan6905	Soybean	Glyma13g07030.1	1344	0	84	1	361
Ccajan4639	Soybean	Glyma14g07590.1	1329	0	87	1	293
Ccajan9710	Soybean	Glyma18g02430.4	1320	0	89	78	362
Ccajan5263	Soybean	Glyma20g29730.1	1307	0	85	1	309
Ccajan6861	Soybean	Glyma01g01300.1	1304	0	91	1	270
Ccajan1441	Soybean	Glyma19g30220.2	1303	0	92	1	270
Ccajan1243	Soybean	Glyma11g20980.1	1311	2e-180	90	176	442
Ccajan1170	Soybean	Glyma09g31580.2	1292	2e-180	89	1	273
Ccajan8325	Soybean	Glyma02g09140.1	1302	1e-179	86	1	329
Ccajan3492	Soybean	Glyma06g12691.1	1300	1e-179	83	1	331
Ccajan5561	Soybean	Glyma13g41920.3	1280	6e-179	95	1	256
Ccajan2556	Soybean	Glyma14g24710.2	1407	1e-178	87	1669	1982
Ccajan7678	Soybean	Glyma15g41740.2	1292	1e-178	82	61	370
Ccajan8115	Soybean	Glyma15g12930.1	1288	2e-178	81	1	313
Ccajan3287	Soybean	Glyma07g14610.1	1289	3e-177	86	1	324
Ccajan8513	Soybean	Glyma12g30240.1	1274	6e-176	83	1	322
Ccajan7243	Soybean	Glyma18g38560.1	1282	8e-176	91	1	349
Ccajan8603	Soybean	Glyma11g14700.1	1291	7e-175	82	337	614
Ccajan2440	Soybean	Glyma02g01420.1	1258	1e-173	90	6	320
Ccajan6985	Soybean	Glyma18g00840.2	1365	7e-173	83	4	299
Ccajan8534	Soybean	Glyma13g44730.1	1250	1e-172	84	1	309
Ccajan6402	Soybean	Glyma11g05550.1	1240	1e-171	83	1	297
Ccajan8552	Soybean	Glyma18g44560.1	1233	3e-170	83	8	298
Ccajan1257	Soybean	Glyma08g40020.5	1229	7e-170	95	3	260
Ccajan4274	Soybean	Glyma18g02940.1	1219	2e-169	91	21	275
Ccajan6966	Soybean	Glyma12g07710.1	1231	5e-169	85	10	305
Ccajan4622	Soybean	Glyma03g29530.1	1220	7e-169	84	1	284
Ccajan5129	Soybean	Glyma14g04070.1	1210	9e-168	88	1	269
Ccajan0609	Soybean	Glyma13g39325.3	1230	9e-167	82	168	460
Ccajan5660	Soybean	Glyma01g42050.1	1199	3e-166	86	1	269
Ccajan0246	Soybean	Glyma03g29930.1	1224	5e-164	91	86	340
Ccajan9403	Soybean	Glyma06g46850.1	1190	5e-164	88	1	281
Ccajan5034	Soybean	Glyma03g31980.1	1183	4e-163	84	1	294
Ccajan2047	Soybean	Glyma18g52491.2	1174	2e-162	83	1	266
Ccajan1141	Soybean	Glyma13g41980.1	1166	4e-162	92	1	239
Ccajan6092	Soybean	Glyma01g40220.1	1175	1e-161	92	1	298
Ccajan3550	Soybean	Glyma05g21220.1	1173	1e-161	81	2	295
Ccajan4353	Soybean	Glyma01g37190.2	1173	1e-161	83	21	296
Ccajan0801	Soybean	Glyma14g06330.1	1168	1e-161	87	1	264
Ccajan4573	Soybean	Glyma02g33040.1	1154	4e-160	91	1	247
Ccajan2566	Soybean	Glyma02g10250.2	1170	1e-159	81	64	371
Ccajan9179	Soybean	Glyma11g06210.4	1161	3e-159	83	1	308
Ccajan0981	Soybean	Glyma15g07730.1	1153	8e-159	81	1	285
Ccajan0327	Soybean	Glyma20g37620.1	1147	2e-158	91	1	245
Ccajan5965	Soybean	Glyma12g03690.3	1145	3e-158	85	1	265
Ccajan3262	Soybean	Glyma05g26990.2	1141	4e-158	92	1	239
Ccajan9549	Soybean	Glyma12g33990.1	1101	1e-151	87	1	263
Ccajan2815	Soybean	Glyma15g36170.1	1108	3e-151	83	2	287
Ccajan6394	Soybean	Glyma07g05950.2	1098	1e-150	87	4	281
Ccajan3120	Soybean	Glyma13g18210.1	1077	1e-148	89	1	234
Ccajan1950	Soybean	Glyma12g33751.1	1078	5e-148	86	3	249
Ccajan2599	Soybean	Glyma20g24600.1	1069	2e-147	86	1	236
Ccajan0735	Soybean	Glyma01g41581.1	1070	6e-147	89	38	268
Ccajan0266	Soybean	Glyma19g31940.2	1056	1e-145	88	1	231
Ccajan9074	Soybean	Glyma10g33450.1	1039	4e-142	83	6	266
Ccajan7595	Soybean	Glyma12g30990.4	1060	8e-142	85	170	412
Ccajan9976	Soybean	Glyma06g04470.1	1021	2e-140	86	1	230
Ccajan3346	Soybean	Glyma19g34600.1	1012	1e-139	89	1	208
Ccajan3638	Soybean	Glyma02g40400.3	1017	4e-137	85	1	228
Ccajan6026	Soybean	Glyma20g33430.1	1011	4e-135	87	33	249
Ccajan2498	Soybean	Glyma13g16770.1	980	2e-134	85	12	233
Ccajan5132	Soybean	Glyma08g08010.1	957	6e-132	95	1	190
Ccajan8473	Soybean	Glyma09g29760.2	962	9e-132	96	82	265
Ccajan5572	Soybean	Glyma05g32590.2	941	4e-129	88	2	206
Ccajan4003	Soybean	Glyma04g37291.1	909	1e-123	97	34	222
Ccajan2071	Soybean	Glyma02g04650.2	899	2e-122	82	1	208
Ccajan6312	Soybean	Glyma10g06680.1	896	2e-121	81	1	232
Ccajan6696	Soybean	Glyma11g35500.1	883	4e-121	93	6	189
Ccajan7218	Soybean	Glyma18g51250.1	881	3e-120	90	1	195
Ccajan8385	Soybean	Glyma04g06690.1	878	5e-120	93	1	193
Ccajan8985	Soybean	Glyma04g38990.1	873	6e-119	86	1	199
Ccajan3959	Soybean	Glyma06g48170.4	876	7e-119	92	1	175
Ccajan1304	Soybean	Glyma20g31780.1	864	5e-117	91	1	222
Ccajan6632	Soybean	Glyma04g01830.1	860	8e-117	86	12	189
Ccajan5958	Soybean	Glyma05g07690.2	863	9e-117	86	41	244
Ccajan8507	Soybean	Glyma13g18350.1	862	9e-117	82	1	219
Ccajan8728	Soybean	Glyma20g01770.1	858	3e-116	86	1	187
Ccajan1041	Soybean	Glyma08g34280.4	848	5e-114	90	123	302
Ccajan0147	Soybean	Glyma04g36620.2	1002	6e-113	90	22	227
Ccajan9259	Soybean	Glyma19g32570.1	847	3e-112	87	34	238
Ccajan6237	Soybean	Glyma13g40370.2	828	3e-112	83	1	196
Ccajan8097	Soybean	Glyma11g15810.1	825	1e-111	81	1	204
Ccajan9537	Soybean	Glyma07g28310.2	825	2e-110	95	129	296
Ccajan8944	Soybean	Glyma14g06270.1	795	1e-107	86	1	182
Ccajan7084	Soybean	Glyma08g23160.1	792	5e-107	82	1	192
Ccajan5941	Soybean	Glyma20g29410.1	795	6e-107	84	1	207
Ccajan7402	Soybean	Glyma17g14700.1	789	7e-105	100	1	143
Ccajan7820	Soybean	Glyma03g32747.3	805	1e-104	88	303	502
Ccajan1710	Soybean	Glyma16g32370.1	794	6e-104	81	1	204
Ccajan8382	Soybean	Glyma12g11150.4	762	9e-102	82	1	203
Ccajan4752	Soybean	Glyma02g13350.2	751	9e-102	98	9	152
Ccajan8072	Soybean	Glyma02g42200.1	755	1e-101	83	1	177
Ccajan1807	Soybean	Glyma02g46270.1	771	1e-100	82	184	359
Ccajan6729	Soybean	Glyma13g27880.1	738	6e-99	93	1	165
Ccajan6055	Soybean	Glyma12g34650.2	750	2e-98	94	1	144
Ccajan4728	Soybean	Glyma04g42420.1	712	1e-95	99	1	139
Ccajan7354	Soybean	Glyma17g14710.1	710	2e-94	84	1	173
Ccajan5101	Soybean	Glyma05g07750.2	683	8e-92	94	21	156
Ccajan9906	Soybean	Glyma10g07740.2	691	1e-91	87	41	204
Ccajan4286	Soybean	Glyma13g01720.1	682	2e-90	95	108	237
Ccajan5901	Soybean	Glyma08g12320.3	674	5e-87	90	1	145
Ccajan9224	Soybean	Glyma13g31010.1	653	8e-87	81	1	163
Ccajan3506	Soybean	Glyma13g01090.2	621	7e-82	84	1	164
Ccajan8562	Soybean	Glyma06g05111.1	608	2e-80	84	1	143
Ccajan7700	Soybean	Glyma15g17090.1	599	1e-79	86	1	130
Ccajan5940	Soybean	Glyma20g29440.1	613	3e-79	83	1	206
Ccajan4788	Soybean	Glyma20g34050.3	595	9e-78	98	1	113
Ccajan8455	Soybean	Glyma13g30154.1	609	1e-77	84	1	143
Ccajan4335	Soybean	Glyma03g36970.2	667	7e-77	85	393	544
Ccajan6286	Soybean	Glyma08g39170.1	597	5e-76	88	189	321
Ccajan0519	Soybean	Glyma17g36370.2	582	5e-75	86	70	197
Ccajan9657	Soybean	Glyma14g10020.1	545	4e-71	82	1	146
Ccajan1117	Soybean	Glyma18g10750.1	544	4e-69	86	34	144
Ccajan6947	Soybean	Glyma18g08620.1	506	4e-65	92	1	105
Ccajan7260	Soybean	Glyma17g03510.1	538	3e-64	95	1	104
Ccajan8822	Soybean	Glyma19g02890.1	507	7e-63	98	1	89
Ccajan6501	Soybean	Glyma17g02741.3	579	9e-61	90	1	117
Ccajan2220	Soybean	Glyma20g34550.1	468	2e-59	85	1	146
Ccajan2734	Soybean	Glyma19g02510.1	436	4e-56	99	1	91
Ccajan4287	Soybean	Glyma14g35140.1	445	3e-55	82	14	123
Ccajan2762	Soybean	Glyma11g12460.1	432	3e-55	92	1	92
Ccajan5063	Soybean	Glyma07g32690.1	447	1e-54	91	1	106
Ccajan0719	Soybean	Glyma08g07260.3	426	1e-52	95	1	86
Ccajan8294	Soybean	Glyma10g04160.1	414	2e-51	82	1	136
Ccajan8386	Soybean	Glyma04g03400.1	406	2e-51	84	1	91
Ccajan2723	Soybean	Glyma01g34490.1	414	4e-51	84	1	98
Ccajan7092	Soybean	Glyma01g40720.3	403	2e-50	93	64	147
Ccajan5717	Soybean	Glyma11g04441.1	449	3e-48	92	453	558
Ccajan5716	Soybean	Glyma19g00730.2	353	6e-44	91	11	80
Ccajan5937	Soybean	Glyma02g06240.1	347	4e-43	91	1	73
Ccajan0586	Soybean	Glyma03g33490.1	355	6e-43	86	1	77
Ccajan2733	Soybean	Glyma06g15260.2	340	6e-40	94	102	180
Ccajan5657	Soybean	Glyma17g20070.1	341	2e-39	93	5	72
Ccajan0507	Soybean	Glyma06g22650.2	320	2e-37	100	1	61
Ccajan8331	Soybean	Glyma10g38541.1	282	1e-31	89	1	61
Ccajan7313	Soybean	Glyma03g29825.1	242	3e-21	90	53	110
Ccajan0358	Mung bean	Vradi02g03910.1	4152	0	83	1	967
Ccajan0545	Mung bean	Vradi10g11430.1	2480	0	91	360	898
Ccajan0710	Mung bean	Vradi0189s00090.1	2432	0	88	1	541
Ccajan0421	Mung bean	Vradi05g22430.1	2349	0	84	1	587
Ccajan0557	Mung bean	Vradi06g01180.1	2108	0	88	101	539
Ccajan0091	Mung bean	Vradi06g02700.1	2106	0	85	99	578
Ccajan0147	Mung bean	Vradi05g05790.1	1750	0	92	175	515
Ccajan0606	Mung bean	Vradi02g06970.1	1686	0	84	1	375
Ccajan0956	Mung bean	Vradi05g19600.1	1490	0	94	1	289
Ccajan0370	Mung bean	Vradi10g03110.1	1456	0	94	1	301
Ccajan0468	Mung bean	Vradi01g01940.1	1412	0	89	1	300
Ccajan0399	Mung bean	Vradi02g01580.1	1403	0	85	5	318
Ccajan0246	Mung bean	Vradi03g00130.1	1224	2e-164	87	83	348
Ccajan0609	Mung bean	Vradi02g06940.1	1197	2e-163	84	133	383
Ccajan0248	Mung bean	Vradi03g00100.1	1119	4e-153	83	18	292
Ccajan10081	Mung bean	Vradi0292s00130.1	1300	3e-180	81	13	338
Ccajan10106	Mung bean	Vradi07g16660.1	1421	0	82	1	339
Ccajan10147	Mung bean	Vradi0262s00020.1	1009	3e-139	84	1	223
Ccajan10163	Mung bean	Vradi0206s00150.1	566	3e-70	83	107	244
Ccajan10352	Mung bean	Vradi0179s00420.1	765	1e-99	85	2	178
Ccajan10438	Mung bean	Vradi0023s00130.1	2520	0	84	1	582
Ccajan10455	Mung bean	Vradi04g03660.1	1900	0	86	18	419
Ccajan10495	Mung bean	Vradi04g07690.1	1304	0	92	1	267
Ccajan10548	Mung bean	Vradi05g18660.1	1234	1e-170	85	47	326
Ccajan10652	Mung bean	Vradi02g10510.1	1432	0	82	1	363
Ccajan10707	Mung bean	Vradi07g11310.1	966	6e-131	83	1	283
Ccajan10723	Mung bean	Vradi10g04500.1	280	2e-30	96	1	52
Ccajan10724	Mung bean	Vradi10g04500.1	288	2e-31	94	1	53
Ccajan10820	Mung bean	Vradi08g18140.1	1192	1e-158	81	1	318
Ccajan10824	Mung bean	Vradi0417s00050.1	2255	0	85	1	533
Ccajan10904	Mung bean	Vradi07g06250.1	1365	0	82	11	342
Ccajan10906	Mung bean	Vradi0169s00280.1	1412	0	88	47	352
Ccajan10969	Mung bean	Vradi11g01060.1	1300	7e-180	81	31	348
Ccajan11226	Mung bean	Vradi06g03760.1	1949	0	88	1	425
Ccajan11282	Mung bean	Vradi06g05760.1	1178	2e-163	89	32	288
Ccajan11330	Mung bean	Vradi07g13140.1	1160	6e-161	92	1	257
Ccajan11355	Mung bean	Vradi02g00390.1	1694	0	88	1	348
Ccajan1139	Mung bean	Vradi0332s00110.1	1407	0	84	1	340
Ccajan1141	Mung bean	Vradi0332s00150.1	1144	3e-159	93	1	241
Ccajan11522	Mung bean	Vradi07g12380.1	624	5e-82	83	1	157
Ccajan11597	Mung bean	Vradi06g15700.1	1250	5e-173	93	15	313
Ccajan11659	Mung bean	Vradi03g03190.1	2102	0	82	1	491
Ccajan11675	Mung bean	Vradi05g21590.1	1015	1e-129	83	106	329
Ccajan11675	Mung bean	Vradi05g21590.1	242	8e-22	85	61	114
Ccajan11759	Mung bean	Vradi08g16550.1	2362	0	89	1	505
Ccajan11822	Mung bean	Vradi0111s00030.1	3145	0	83	7	726
Ccajan11829	Mung bean	Vradi07g26570.1	2394	0	85	27	552
Ccajan11921	Mung bean	Vradi07g21010.1	750	1e-99	96	171	314
Ccajan12037	Mung bean	Vradi10g02570.1	2556	0	88	1	546
Ccajan12178	Mung bean	Vradi0147s00050.1	882	5e-119	92	6	221
Ccajan12207	Mung bean	Vradi10g11730.1	897	1e-122	82	18	224
Ccajan12236	Mung bean	Vradi0153s00150.1	219	3e-22	82	28	71
Ccajan12281	Mung bean	Vradi0083s01090.1	1031	2e-134	85	111	339
Ccajan12289	Mung bean	Vradi05g16830.1	1363	0	84	146	434
Ccajan1231	Mung bean	Vradi0183s00260.1	1405	0	89	1	326
Ccajan12325	Mung bean	Vradi0023s00720.1	710	2e-92	83	1	159
Ccajan12325	Mung bean	Vradi0023s00720.1	225	1e-21	82	156	211
Ccajan12422	Mung bean	Vradi08g08840.1	779	1e-102	95	98	244
Ccajan12432	Mung bean	Vradi0215s00360.1	1060	4e-143	83	33	273
Ccajan12432	Mung bean	Vradi0215s00360.1	180	8e-15	89	1	36
Ccajan12480	Mung bean	Vradi0207s00010.1	1070	5e-148	89	1	239
Ccajan12481	Mung bean	Vradi10g11540.1	1677	0	86	1	374
Ccajan12483	Mung bean	Vradi08g16460.1	1411	0	92	1	338
Ccajan12609	Mung bean	Vradi11g11880.1	1706	0	84	95	482
Ccajan12626	Mung bean	Vradi01g01680.1	1064	1e-146	94	1	231
Ccajan12656	Mung bean	Vradi0223s00050.1	1741	0	91	1	369
Ccajan12659	Mung bean	Vradi07g26120.1	1166	1e-161	92	1	269
Ccajan12685	Mung bean	Vradi10g10130.1	539	4e-66	83	37	184
Ccajan12685	Mung bean	Vradi10g10130.1	242	2e-23	100	169	215
Ccajan12707	Mung bean	Vradi01g08880.1	991	1e-134	82	21	281
Ccajan12733	Mung bean	Vradi06g10500.1	1013	1e-138	89	1	257
Ccajan12787	Mung bean	Vradi03g01220.1	1319	0	88	1	292
Ccajan12992	Mung bean	Vradi11g12280.1	864	3e-118	88	1	194
Ccajan13024	Mung bean	Vradi06g06770.1	2539	0	90	1	573
Ccajan13026	Mung bean	Vradi09g09360.1	198	3e-20	86	74	117
Ccajan13105	Mung bean	Vradi0456s00020.1	640	2e-79	84	1	162
Ccajan13115	Mung bean	Vradi07g06100.1	1697	0	81	1	404
Ccajan13119	Mung bean	Vradi02g06910.1	806	1e-108	96	131	281
Ccajan13194	Mung bean	Vradi0190s00250.1	979	1e-134	89	1	217
Ccajan13237	Mung bean	Vradi07g19800.1	1865	0	88	1	445
Ccajan13283	Mung bean	Vradi10g03060.1	1047	6e-144	95	1	202
Ccajan13373	Mung bean	Vradi08g17010.1	6873	0	81	1	1630
Ccajan13427	Mung bean	Vradi11g09310.1	1064	1e-142	84	16	260
Ccajan13527	Mung bean	Vradi03g07250.1	1432	0	85	27	364
Ccajan13554	Mung bean	Vradi05g13270.1	388	2e-48	92	1	79
Ccajan13599	Mung bean	Vradi0111s00300.1	1180	1e-162	91	1	246
Ccajan13714	Mung bean	Vradi0363s00120.1	2322	0	83	76	663
Ccajan13782	Mung bean	Vradi07g13210.1	744	1e-99	97	145	287
Ccajan13783	Mung bean	Vradi03g04320.1	2611	0	88	25	590
Ccajan13798	Mung bean	Vradi07g21010.1	667	3e-87	85	171	314
Ccajan13824	Mung bean	Vradi01g05590.1	752	1e-98	100	38	171
Ccajan13876	Mung bean	Vradi03g07900.1	1251	7e-173	81	1	321
Ccajan1393	Mung bean	Vradi09g02480.1	1435	0	84	1	324
Ccajan14050	Mung bean	Vradi07g00590.1	865	1e-116	84	112	308
Ccajan14088	Mung bean	Vradi07g14730.1	2048	0	84	55	516
Ccajan14109	Mung bean	Vradi11g08630.1	727	8e-95	85	51	235
Ccajan14131	Mung bean	Vradi07g28390.1	2400	0	83	2	513
Ccajan14154	Mung bean	Vradi05g13720.1	1748	0	95	1	337
Ccajan14197	Mung bean	Vradi02g07420.1	1998	0	86	18	458
Ccajan14226	Mung bean	Vradi01g01730.1	1349	0	84	1	319
Ccajan14272	Mung bean	Vradi10g10410.1	1750	0	90	1	396
Ccajan14365	Mung bean	Vradi05g20610.1	3928	0	96	24	790
Ccajan14446	Mung bean	Vradi06g02390.1	774	1e-103	89	1	161
Ccajan14478	Mung bean	Vradi03g04100.1	1080	2e-146	89	1	225
Ccajan14509	Mung bean	Vradi02g00520.1	317	9e-38	94	1	64
Ccajan14511	Mung bean	Vradi05g21870.1	791	3e-106	97	1	145
Ccajan14530	Mung bean	Vradi08g16870.1	1391	0	82	1	366
Ccajan14632	Mung bean	Vradi0308s00040.1	1473	0	95	1	285
Ccajan14661	Mung bean	Vradi07g06540.1	529	4e-65	87	1	113
Ccajan14709	Mung bean	Vradi0083s00820.1	185	1e-18	87	211	248
Ccajan14709	Mung bean	Vradi0083s00820.1	111	4e-08	88	105	128
Ccajan14735	Mung bean	Vradi09g09920.1	3531	0	82	1	826
Ccajan14841	Mung bean	Vradi11g08220.1	700	2e-90	90	98	253
Ccajan14841	Mung bean	Vradi11g08220.1	451	3e-53	93	7	92
Ccajan14847	Mung bean	Vradi03g07760.1	1169	4e-162	87	16	276
Ccajan14888	Mung bean	Vradi10g05010.1	1380	0	83	1	312
Ccajan14921	Mung bean	Vradi0214s00100.1	377	1e-44	92	82	158
Ccajan14938	Mung bean	Vradi0007s00620.1	550	3e-69	85	1	122
Ccajan14938	Mung bean	Vradi0007s00620.1	485	1e-59	84	103	204
Ccajan14968	Mung bean	Vradi11g01350.1	369	3e-44	84	9	103
Ccajan14994	Mung bean	Vradi11g05500.1	931	1e-119	82	4	195
Ccajan14997	Mung bean	Vradi0341s00020.1	1273	1e-176	85	1	276
Ccajan15012	Mung bean	Vradi01g08250.1	298	6e-33	88	57	121
Ccajan15012	Mung bean	Vradi01g08250.1	219	8e-22	96	1	55
Ccajan15248	Mung bean	Vradi11g04060.1	313	8e-35	92	1	63
Ccajan15360	Mung bean	Vradi05g19440.1	245	2e-26	93	1	46
Ccajan15540	Mung bean	Vradi05g09250.1	987	2e-133	84	1	211
Ccajan15569	Mung bean	Vradi11g09420.1	294	6e-34	93	1	60
Ccajan15610	Mung bean	Vradi08g11380.1	1271	2e-176	85	1	294
Ccajan15612	Mung bean	Vradi0048s00470.1	534	3e-67	94	16	118
Ccajan15612	Mung bean	Vradi0048s00470.1	78	0.02	93	1	15
Ccajan15613	Mung bean	Vradi01g01640.1	1407	0	82	62	399
Ccajan1572	Mung bean	Vradi08g21520.1	1834	0	88	39	462
Ccajan15737	Mung bean	Vradi05g21980.1	3396	0	87	1	746
Ccajan15894	Mung bean	Vradi08g19620.1	991	3e-122	89	573	783
Ccajan15895	Mung bean	Vradi06g14400.1	2012	0	88	32	465
Ccajan15906	Mung bean	Vradi04g11240.1	991	5e-135	83	5	241
Ccajan15956	Mung bean	Vradi07g17390.1	2285	0	82	1	563
Ccajan16045	Mung bean	Vradi03g09200.1	1222	3e-168	95	1	280
Ccajan16073	Mung bean	Vradi10g02130.1	306	4e-34	81	19	93
Ccajan16087	Mung bean	Vradi04g09520.1	299	6e-34	94	1	66
Ccajan16100	Mung bean	Vradi01g11280.1	2291	0	84	20	531
Ccajan16112	Mung bean	Vradi10g10490.1	1847	0	81	14	438
Ccajan16131	Mung bean	Vradi01g02740.1	672	2e-90	81	1	159
Ccajan16141	Mung bean	Vradi03g06680.1	95	5e-05	85	109	128
Ccajan16141	Mung bean	Vradi03g06680.1	78	0.01	94	128	144
Ccajan16173	Mung bean	Vradi11g09230.1	1313	0	82	1	343
Ccajan16231	Mung bean	Vradi0536s00010.1	1312	0	82	1	330
Ccajan16239	Mung bean	Vradi07g17680.1	907	4e-119	84	1	227
Ccajan16320	Mung bean	Vradi06g15010.1	969	6e-133	89	1	211
Ccajan16394	Mung bean	Vradi0043s00400.1	184	7e-19	87	60	97
Ccajan16444	Mung bean	Vradi0361s00030.1	480	9e-60	83	21	126
Ccajan16611	Mung bean	Vradi08g08710.1	501	7e-63	89	1	124
Ccajan16649	Mung bean	Vradi0425s00070.1	1511	0	85	1	357
Ccajan16716	Mung bean	Vradi0312s00040.1	811	7e-108	90	1	166
Ccajan16718	Mung bean	Vradi07g27990.1	1866	0	82	1	471
Ccajan16892	Mung bean	Vradi0360s00120.1	1651	0	99	169	480
Ccajan16892	Mung bean	Vradi0360s00120.1	325	1e-31	83	91	170
Ccajan17233	Mung bean	Vradi0397s00040.1	1905	0	84	36	513
Ccajan17291	Mung bean	Vradi10g11680.1	1547	0	82	1	365
Ccajan17318	Mung bean	Vradi04g06070.1	2670	0	86	30	581
Ccajan17350	Mung bean	Vradi11g04710.1	680	5e-90	91	1	157
Ccajan17442	Mung bean	Vradi01g02500.1	1697	0	86	1	360
Ccajan17671	Mung bean	Vradi02g07900.1	3779	0	97	31	749
Ccajan17753	Mung bean	Vradi02g08980.1	949	7e-127	96	40	228
Ccajan17753	Mung bean	Vradi02g08980.1	214	1e-19	98	1	41
Ccajan17776	Mung bean	Vradi02g07200.1	368	8e-44	87	54	159
Ccajan17789	Mung bean	Vradi05g03240.1	758	1e-100	99	190	332
Ccajan17910	Mung bean	Vradi07g04210.1	977	4e-133	81	1	225
Ccajan17971	Mung bean	Vradi0161s00550.1	192	2e-17	86	130	172
Ccajan18108	Mung bean	Vradi07g17780.1	932	5e-126	87	74	275
Ccajan18131	Mung bean	Vradi09g01460.1	1600	0	89	1	348
Ccajan18172	Mung bean	Vradi07g01260.1	3734	0	87	1	798
Ccajan18213	Mung bean	Vradi03g10220.1	1823	0	87	20	425
Ccajan18218	Mung bean	Vradi06g07230.1	1259	4e-171	88	1	262
Ccajan18240	Mung bean	Vradi0308s00040.1	1134	1e-156	88	38	285
Ccajan18284	Mung bean	Vradi01g03350.1	1551	0	86	1	352
Ccajan18360	Mung bean	Vradi11g12920.1	844	1e-110	84	97	284
Ccajan18378	Mung bean	Vradi03g05190.1	1348	0	83	1	316
Ccajan18401	Mung bean	Vradi05g17220.1	402	4e-47	93	9	88
Ccajan18401	Mung bean	Vradi05g17220.1	305	4e-33	97	88	149
Ccajan18579	Mung bean	Vradi11g03860.1	814	1e-106	88	1	178
Ccajan18643	Mung bean	Vradi0169s00230.1	461	6e-58	93	1	88
Ccajan18703	Mung bean	Vradi11g10760.1	1284	5e-177	92	113	378
Ccajan19044	Mung bean	Vradi07g21630.1	870	4e-116	83	144	355
Ccajan19071	Mung bean	Vradi04g02860.1	3039	0	87	1	700
Ccajan19084	Mung bean	Vradi07g20050.1	1836	0	83	86	519
Ccajan19089	Mung bean	Vradi10g09050.1	1498	0	88	1	351
Ccajan19151	Mung bean	Vradi07g29640.1	1725	0	87	1	361
Ccajan19189	Mung bean	Vradi0367s00030.1	1086	4e-149	91	1	232
Ccajan19246	Mung bean	Vradi09g01470.1	1262	7e-162	97	594	837
Ccajan19293	Mung bean	Vradi01g11250.1	2083	0	89	1	463
Ccajan19333	Mung bean	Vradi05g18150.1	924	2e-123	84	30	244
Ccajan19333	Mung bean	Vradi05g18150.1	148	6e-11	94	1	31
Ccajan19359	Mung bean	Vradi08g19030.1	3669	0	92	15	793
Ccajan19555	Mung bean	Vradi05g19440.1	238	1e-25	89	1	46
Ccajan19634	Mung bean	Vradi0189s00040.1	1048	4e-145	94	1	210
Ccajan19657	Mung bean	Vradi0279s00040.1	3236	0	88	4	681
Ccajan19708	Mung bean	Vradi07g18130.1	1071	8e-146	84	1	255
Ccajan19829	Mung bean	Vradi07g10580.1	455	9e-56	95	111	201
Ccajan19861	Mung bean	Vradi05g09250.1	1016	6e-138	90	1	208
Ccajan19912	Mung bean	Vradi0171s00130.1	498	6e-63	82	84	203
Ccajan19968	Mung bean	Vradi05g22890.1	754	1e-101	91	3	192
Ccajan20027	Mung bean	Vradi06g15860.1	425	1e-54	84	1	92
Ccajan20103	Mung bean	Vradi08g06550.1	1787	0	84	70	497
Ccajan20135	Mung bean	Vradi0146s00050.1	840	3e-112	83	1	210
Ccajan20199	Mung bean	Vradi0133s00230.1	2890	0	81	1	640
Ccajan20205	Mung bean	Vradi08g11820.1	1539	0	81	1	366
Ccajan20215	Mung bean	Vradi11g04580.1	514	3e-66	86	6	142
Ccajan20326	Mung bean	Vradi06g00500.1	1073	2e-144	82	1	255
Ccajan20338	Mung bean	Vradi10g04910.1	815	1e-109	94	38	196
Ccajan2194	Mung bean	Vradi08g17230.1	2278	0	85	1	493
Ccajan2196	Mung bean	Vradi08g17210.1	2154	0	95	2	426
Ccajan20388	Mung bean	Vradi02g08080.1	394	1e-48	87	2	93
Ccajan20392	Mung bean	Vradi05g04520.1	426	5e-54	99	1	81
Ccajan20399	Mung bean	Vradi05g23470.1	1559	0	87	1	349
Ccajan20403	Mung bean	Vradi06g08690.1	2942	0	83	1	661
Ccajan20436	Mung bean	Vradi09g09920.1	2109	0	93	91	521
Ccajan20453	Mung bean	Vradi09g07290.1	1222	3e-168	86	132	391
Ccajan20543	Mung bean	Vradi0374s00040.1	895	1e-118	90	1	188
Ccajan20576	Mung bean	Vradi0043s00740.1	734	2e-98	99	1	136
Ccajan20594	Mung bean	Vradi07g31420.1	1013	2e-138	81	55	295
Ccajan20730	Mung bean	Vradi03g06560.1	971	6e-133	86	31	258
Ccajan20769	Mung bean	Vradi07g00360.1	1355	0	90	4	297
Ccajan20809	Mung bean	Vradi06g06550.1	945	8e-129	89	14	260
Ccajan20889	Mung bean	Vradi02g10370.1	544	7e-72	85	1	123
Ccajan20936	Mung bean	Vradi08g03580.1	368	1e-45	85	1	81
Ccajan20938	Mung bean	Vradi0189s00040.1	313	9e-37	98	1	61
Ccajan20956	Mung bean	Vradi11g04600.1	195	3e-16	85	471	516
Ccajan21046	Mung bean	Vradi0171s00090.1	2853	0	88	39	681
Ccajan21294	Mung bean	Vradi07g02940.1	130	1e-10	87	2	32
Ccajan21330	Mung bean	Vradi07g11760.1	1598	0	86	1	343
Ccajan21356	Mung bean	Vradi10g01640.1	2784	0	85	11	607
Ccajan21415	Mung bean	Vradi05g07180.1	1572	0	92	106	437
Ccajan21520	Mung bean	Vradi07g03150.1	2243	0	84	3	505
Ccajan21575	Mung bean	Vradi07g28790.1	1468	0	92	1	294
Ccajan21635	Mung bean	Vradi06g02730.1	983	8e-131	86	55	278
Ccajan21666	Mung bean	Vradi09g04990.1	898	4e-123	89	32	224
Ccajan21724	Mung bean	Vradi0553s00010.1	4137	0	82	1	978
Ccajan21775	Mung bean	Vradi11g00060.1	1849	0	92	644	1026
Ccajan21816	Mung bean	Vradi08g04230.1	1375	0	88	38	323
Ccajan21818	Mung bean	Vradi04g08690.1	387	3e-49	88	1	84
Ccajan21851	Mung bean	Vradi0259s00080.1	704	4e-93	88	109	254
Ccajan21862	Mung bean	Vradi10g06480.1	4289	0	94	1	855
Ccajan21941	Mung bean	Vradi11g08600.1	1024	2e-134	92	1	204
Ccajan22041	Mung bean	Vradi11g04980.1	550	1e-68	88	3	117
Ccajan22112	Mung bean	Vradi08g21830.1	756	1e-100	99	1	136
Ccajan22156	Mung bean	Vradi0073s00080.1	546	6e-69	84	1	129
Ccajan22222	Mung bean	Vradi02g06990.1	427	1e-54	90	2	92
Ccajan22226	Mung bean	Vradi05g08670.1	4300	0	96	2	828
Ccajan22318	Mung bean	Vradi07g10060.1	770	8e-103	84	1	209
Ccajan22322	Mung bean	Vradi10g00910.1	1073	6e-147	88	1	251
Ccajan22357	Mung bean	Vradi03g02100.1	1351	0	86	1	349
Ccajan22507	Mung bean	Vradi11g12460.1	1844	0	87	9	429
Ccajan22519	Mung bean	Vradi11g05440.1	2183	0	81	1	517
Ccajan22550	Mung bean	Vradi08g10760.1	653	1e-87	84	1	148
Ccajan22630	Mung bean	Vradi0070s00230.1	873	1e-118	85	1	186
Ccajan22634	Mung bean	Vradi02g04370.1	1759	0	82	1	420
Ccajan22694	Mung bean	Vradi10g03060.1	1531	0	87	1	325
Ccajan2274	Mung bean	Vradi0023s00780.1	1592	0	90	1	343
Ccajan22763	Mung bean	Vradi04g10580.1	611	1e-80	81	1	161
Ccajan22937	Mung bean	Vradi05g05430.1	765	8e-101	87	13	175
Ccajan2311	Mung bean	Vradi07g13350.1	2802	0	82	1	645
Ccajan23160	Mung bean	Vradi08g22550.1	1210	3e-168	87	5	269
Ccajan23189	Mung bean	Vradi01g07000.1	1782	0	85	35	492
Ccajan23249	Mung bean	Vradi0179s00130.1	1463	0	82	5	337
Ccajan23261	Mung bean	Vradi07g14110.1	285	3e-34	92	1	60
Ccajan23262	Mung bean	Vradi05g09280.1	950	6e-128	83	97	332
Ccajan23313	Mung bean	Vradi0368s00040.1	319	7e-38	100	1	61
Ccajan23336	Mung bean	Vradi03g09620.1	2767	0	81	1	654
Ccajan23362	Mung bean	Vradi07g22030.1	1672	0	91	1	361
Ccajan23375	Mung bean	Vradi10g12650.1	883	3e-121	90	1	189
Ccajan23394	Mung bean	Vradi05g18850.1	611	9e-80	96	1	116
Ccajan23510	Mung bean	Vradi10g07480.1	2545	0	89	1	533
Ccajan23570	Mung bean	Vradi04g09280.1	1527	0	85	30	385
Ccajan23654	Mung bean	Vradi10g07270.1	598	2e-74	84	154	282
Ccajan23707	Mung bean	Vradi07g05650.1	754	3e-99	89	1	169
Ccajan23751	Mung bean	Vradi0223s00220.1	910	2e-125	95	1	178
Ccajan23803	Mung bean	Vradi11g10230.1	1690	0	81	1	418
Ccajan23857	Mung bean	Vradi11g06240.1	796	2e-106	99	2	146
Ccajan24008	Mung bean	Vradi05g17760.1	1027	5e-141	83	1	250
Ccajan24009	Mung bean	Vradi0133s00220.1	2254	0	87	157	650
Ccajan24009	Mung bean	Vradi0133s00220.1	397	5e-41	93	13	87
Ccajan24070	Mung bean	Vradi08g02310.1	2592	0	91	1	546
Ccajan24070	Mung bean	Vradi08g02310.1	309	2e-29	82	544	627
Ccajan24092	Mung bean	Vradi07g12330.1	1307	0	86	41	329
Ccajan24129	Mung bean	Vradi03g04330.1	791	2e-105	86	38	234
Ccajan24177	Mung bean	Vradi07g29990.1	1461	0	85	1	311
Ccajan24421	Mung bean	Vradi02g04510.1	1419	0	87	1	325
Ccajan24455	Mung bean	Vradi10g10750.1	358	3e-39	83	21	106
Ccajan24585	Mung bean	Vradi09g03680.1	1869	0	87	1	426
Ccajan24754	Mung bean	Vradi06g08210.1	319	9e-37	94	1	65
Ccajan24876	Mung bean	Vradi0007s01260.1	2009	0	83	1	479
Ccajan24932	Mung bean	Vradi11g04600.1	1419	0	81	1	370
Ccajan24932	Mung bean	Vradi11g04600.1	224	8e-20	96	471	516
Ccajan25006	Mung bean	Vradi07g28790.1	1491	0	92	1	294
Ccajan25046	Mung bean	Vradi01g05760.1	3321	0	89	1	675
Ccajan25089	Mung bean	Vradi04g09020.1	1890	0	84	1	415
Ccajan2509	Mung bean	Vradi09g02510.1	2437	0	84	1	539
Ccajan25116	Mung bean	Vradi05g12640.1	1083	2e-146	85	38	308
Ccajan25127	Mung bean	Vradi10g13190.1	1748	0	98	2	328
Ccajan25178	Mung bean	Vradi04g00170.1	386	6e-45	88	82	161
Ccajan25178	Mung bean	Vradi04g00170.1	244	2e-24	82	153	231
Ccajan25288	Mung bean	Vradi07g25390.1	609	1e-81	90	2	124
Ccajan25439	Mung bean	Vradi07g06320.1	1231	2e-169	88	49	303
Ccajan25481	Mung bean	Vradi0086s00060.1	1392	0	95	8	286
Ccajan25534	Mung bean	Vradi0149s00030.1	1144	1e-158	93	1	258
Ccajan25652	Mung bean	Vradi04g00980.1	2261	0	85	1	525
Ccajan25673	Mung bean	Vradi03g01690.1	765	2e-102	86	1	146
Ccajan2572	Mung bean	Vradi11g10120.1	1429	0	90	8	338
Ccajan25820	Mung bean	Vradi11g04520.1	921	6e-124	88	45	254
Ccajan25855	Mung bean	Vradi08g15920.1	767	3e-101	82	1	179
Ccajan25953	Mung bean	Vradi01g09720.1	1544	0	85	1	347
Ccajan25979	Mung bean	Vradi02g04800.1	2627	0	81	46	659
Ccajan26114	Mung bean	Vradi04g04530.1	193	6e-18	90	102	140
Ccajan26443	Mung bean	Vradi0234s00080.1	2571	0	85	69	693
Ccajan26488	Mung bean	Vradi03g08710.1	742	2e-100	82	1	172
Ccajan26541	Mung bean	Vradi0332s00180.1	1265	3e-176	91	53	310
Ccajan26562	Mung bean	Vradi01g07040.1	304	6e-36	95	1	61
Ccajan26570	Mung bean	Vradi08g22260.1	975	4e-133	83	1	243
Ccajan26629	Mung bean	Vradi02g14400.1	466	4e-58	88	1	99
Ccajan26722	Mung bean	Vradi0122s00050.1	418	3e-51	82	15	101
Ccajan26816	Mung bean	Vradi02g03790.1	1782	0	82	432	858
Ccajan26937	Mung bean	Vradi0083s01120.1	1023	1e-140	81	11	253
Ccajan26959	Mung bean	Vradi07g27750.1	424	8e-53	96	104	185
Ccajan26968	Mung bean	Vradi07g28200.1	1338	4e-177	85	602	890
Ccajan26983	Mung bean	Vradi01g14380.1	432	2e-53	90	1	89
Ccajan27118	Mung bean	Vradi07g06290.1	62	5.7	100	369	379
Ccajan27121	Mung bean	Vradi0330s00070.1	1776	0	81	1	404
Ccajan27145	Mung bean	Vradi10g05430.1	562	2e-68	82	1	169
Ccajan27145	Mung bean	Vradi10g05430.1	227	4e-21	81	187	240
Ccajan27174	Mung bean	Vradi08g08860.1	662	3e-87	87	127	276
Ccajan27287	Mung bean	Vradi02g06910.1	727	5e-97	94	136	276
Ccajan27307	Mung bean	Vradi06g14330.1	888	8e-120	86	18	228
Ccajan27332	Mung bean	Vradi02g05690.1	925	3e-119	90	1	226
Ccajan27336	Mung bean	Vradi06g14320.1	658	2e-85	96	231	357
Ccajan27471	Mung bean	Vradi05g08260.1	577	4e-74	88	98	234
Ccajan27487	Mung bean	Vradi03g06370.1	214	2e-22	87	1	45
Ccajan27703	Mung bean	Vradi11g02000.1	1365	0	84	18	328
Ccajan27707	Mung bean	Vradi07g17110.1	543	2e-69	88	1	119
Ccajan27725	Mung bean	Vradi11g10080.1	971	8e-133	82	14	249
Ccajan27728	Mung bean	Vradi08g03580.1	350	7e-44	85	1	75
Ccajan27792	Mung bean	Vradi03g09150.1	453	3e-59	93	1	90
Ccajan27892	Mung bean	Vradi07g30210.1	1546	0	81	1	383
Ccajan27910	Mung bean	Vradi07g14740.1	1262	2e-174	81	1	329
Ccajan27922	Mung bean	Vradi07g21950.1	1678	0	88	1	372
Ccajan28016	Mung bean	Vradi10g01640.1	2614	0	81	11	607
Ccajan28019	Mung bean	Vradi09g07290.1	301	1e-33	87	1	73
Ccajan28057	Mung bean	Vradi03g00030.1	1416	0	82	102	440
Ccajan28109	Mung bean	Vradi04g05840.1	459	2e-58	90	27	127
Ccajan28192	Mung bean	Vradi0393s00140.1	1071	2e-139	85	1	238
Ccajan28192	Mung bean	Vradi0393s00140.1	748	2e-91	94	236	388
Ccajan28212	Mung bean	Vradi0086s00680.1	1433	0	86	1	326
Ccajan28282	Mung bean	Vradi0007s01690.1	1477	0	85	13	351
Ccajan28408	Mung bean	Vradi10g03400.1	1629	0	83	3	385
Ccajan28448	Mung bean	Vradi0267s00010.1	2272	0	88	1	491
Ccajan28506	Mung bean	Vradi03g01110.1	945	5e-127	94	1	188
Ccajan28514	Mung bean	Vradi02g08100.1	527	4e-67	81	1	113
Ccajan28582	Mung bean	Vradi10g07380.1	3371	0	90	1	675
Ccajan28697	Mung bean	Vradi05g11170.1	1331	0	84	1	291
Ccajan28742	Mung bean	Vradi08g13260.1	760	3e-101	85	124	311
Ccajan28755	Mung bean	Vradi01g00480.1	593	2e-78	97	4	116
Ccajan28788	Mung bean	Vradi0007s00100.1	3158	0	81	37	828
Ccajan28818	Mung bean	Vradi10g02120.1	327	3e-38	90	8	75
Ccajan28879	Mung bean	Vradi05g07600.1	692	2e-90	85	1	157
Ccajan2901	Mung bean	Vradi05g22620.1	3730	0	90	1	778
Ccajan29017	Mung bean	Vradi06g05350.1	938	2e-127	83	82	300
Ccajan29026	Mung bean	Vradi07g08950.1	1317	0	91	46	325
Ccajan29046	Mung bean	Vradi03g04780.1	154	5e-14	97	159	187
Ccajan29120	Mung bean	Vradi01g12370.1	162	3e-14	82	41	78
Ccajan29140	Mung bean	Vradi07g06290.1	1512	0	84	1	379
Ccajan29164	Mung bean	Vradi05g16960.1	3263	0	87	1	722
Ccajan29170	Mung bean	Vradi04g10090.1	1520	0	88	1	326
Ccajan29234	Mung bean	Vradi0023s00060.1	944	2e-127	84	1	250
Ccajan29450	Mung bean	Vradi10g10400.1	380	8e-46	84	3	91
Ccajan2953	Mung bean	Vradi11g07760.1	3298	0	95	1	657
Ccajan29553	Mung bean	Vradi07g17000.1	357	5e-45	89	1	78
Ccajan29677	Mung bean	Vradi06g05140.1	955	4e-131	81	6	222
Ccajan29731	Mung bean	Vradi04g04380.1	477	5e-61	90	91	202
Ccajan29753	Mung bean	Vradi0227s00040.1	413	2e-52	82	3	116
Ccajan29768	Mung bean	Vradi02g11390.1	896	2e-121	91	1	203
Ccajan29821	Mung bean	Vradi08g08730.1	2419	0	89	63	566
Ccajan29996	Mung bean	Vradi01g14380.1	1313	0	85	1	289
Ccajan30173	Mung bean	Vradi04g08720.1	1407	0	87	1	317
Ccajan30177	Mung bean	Vradi0281s00010.1	1572	0	90	1	329
Ccajan30183	Mung bean	Vradi02g01260.1	148	6e-13	89	624	659
Ccajan30267	Mung bean	Vradi05g23530.1	360	6e-43	82	1	115
Ccajan30289	Mung bean	Vradi05g23470.1	767	2e-101	85	1	156
Ccajan30295	Mung bean	Vradi09g02440.1	1092	2e-150	84	1	270
Ccajan30765	Mung bean	Vradi07g10690.1	552	2e-72	83	3	145
Ccajan30831	Mung bean	Vradi08g11380.1	228	1e-24	95	260	301
Ccajan30856	Mung bean	Vradi01g10590.1	352	9e-40	88	66	139
Ccajan30956	Mung bean	Vradi05g04140.1	1393	0	90	38	338
Ccajan31037	Mung bean	Vradi08g16880.1	2702	0	86	1	606
Ccajan31256	Mung bean	Vradi02g14260.1	932	2e-125	85	155	366
Ccajan31373	Mung bean	Vradi01g09720.1	295	3e-31	93	41	99
Ccajan31441	Mung bean	Vradi03g07950.1	1946	0	87	56	467
Ccajan31563	Mung bean	Vradi07g12360.1	1189	9e-165	95	98	333
Ccajan31603	Mung bean	Vradi06g15060.1	553	2e-70	85	1	128
Ccajan31656	Mung bean	Vradi03g03350.1	219	4e-24	85	1	83
Ccajan31674	Mung bean	Vradi11g06170.1	1200	6e-153	88	1298	1550
Ccajan31734	Mung bean	Vradi06g14320.1	561	9e-71	89	229	357
Ccajan31752	Mung bean	Vradi10g10590.1	895	1e-110	86	1	225
Ccajan31894	Mung bean	Vradi01g00920.1	1163	3e-161	89	32	284
Ccajan31927	Mung bean	Vradi0111s00010.1	331	9e-37	94	1	71
Ccajan31957	Mung bean	Vradi0189s00030.1	310	2e-36	100	1	61
Ccajan3200	Mung bean	Vradi05g11960.1	1433	0	84	1	340
Ccajan3230	Mung bean	Vradi08g16580.1	1878	0	81	54	520
Ccajan32331	Mung bean	Vradi04g07100.1	617	2e-78	86	86	245
Ccajan32377	Mung bean	Vradi05g12600.1	649	5e-87	86	2	156
Ccajan32457	Mung bean	Vradi01g09400.1	285	7e-31	93	109	175
Ccajan3246	Mung bean	Vradi0158s00330.1	1582	0	88	35	417
Ccajan32512	Mung bean	Vradi02g06530.1	3075	0	95	28	658
Ccajan32627	Mung bean	Vradi05g06870.1	1213	5e-165	82	114	399
Ccajan32836	Mung bean	Vradi07g19770.1	394	4e-48	96	18	93
Ccajan33031	Mung bean	Vradi05g02080.1	1165	1e-159	85	1	276
Ccajan33040	Mung bean	Vradi08g05970.1	803	3e-103	84	38	218
Ccajan33040	Mung bean	Vradi08g05970.1	477	6e-55	83	219	331
Ccajan33082	Mung bean	Vradi07g13210.1	750	2e-100	97	145	287
Ccajan33122	Mung bean	Vradi04g02680.1	906	7e-116	90	136	318
Ccajan33140	Mung bean	Vradi06g08080.1	1378	0	84	48	378
Ccajan33206	Mung bean	Vradi0283s00120.1	1036	3e-141	94	80	325
Ccajan3324	Mung bean	Vradi11g11130.1	4362	0	85	1	1012
Ccajan33240	Mung bean	Vradi01g09720.1	407	2e-48	83	1	99
Ccajan33350	Mung bean	Vradi02g04960.1	1077	8e-148	85	55	295
Ccajan33574	Mung bean	Vradi10g08030.1	397	4e-48	84	1	83
Ccajan3364	Mung bean	Vradi04g01530.1	2521	0	83	10	593
Ccajan3312	Mung bean	Vradi07g23290.1	1473	0	85	1	356
Ccajan33913	Mung bean	Vradi06g01560.1	1457	0	84	9	352
Ccajan34025	Mung bean	Vradi08g04230.1	628	1e-81	83	38	179
Ccajan34109	Mung bean	Vradi07g18660.1	676	4e-89	86	1	146
Ccajan34126	Mung bean	Vradi0111s00350.1	97	3e-06	90	1	21
Ccajan34218	Mung bean	Vradi07g14110.1	292	2e-35	95	1	60
Ccajan34410	Mung bean	Vradi03g09620.1	147	2e-10	81	18	49
Ccajan34498	Mung bean	Vradi07g14790.1	376	4e-46	81	1	85
Ccajan34573	Mung bean	Vradi05g11810.1	983	2e-131	91	147	338
Ccajan34630	Mung bean	Vradi05g22670.1	295	9e-36	81	1	77
Ccajan34697	Mung bean	Vradi11g01480.1	1497	0	86	1	356
Ccajan34814	Mung bean	Vradi01g10680.1	680	3e-90	82	1	175
Ccajan35011	Mung bean	Vradi11g06240.1	677	1e-88	82	5	146
Ccajan35078	Mung bean	Vradi10g13250.1	2913	0	92	1	637
Ccajan35237	Mung bean	Vradi02g04070.1	808	7e-108	82	29	216
Ccajan35294	Mung bean	Vradi06g15000.1	549	3e-72	86	1	123
Ccajan35862	Mung bean	Vradi0281s00010.1	1391	0	89	1	296
Ccajan3588	Mung bean	Vradi11g05250.1	4816	0	87	321	1340
Ccajan35940	Mung bean	Vradi03g06490.1	669	3e-90	90	1	144
Ccajan3726	Mung bean	Vradi06g00510.1	2758	0	94	1	543
Ccajan3609	Mung bean	Vradi05g22860.1	2273	0	94	1	451
Ccajan36373	Mung bean	Vradi0122s00050.1	418	1e-51	82	15	103
Ccajan3711	Mung bean	Vradi02g01980.1	1962	0	90	1	430
Ccajan3685	Mung bean	Vradi0133s00310.1	1795	0	88	134	523
Ccajan37173	Mung bean	Vradi05g17260.1	468	1e-59	90	111	207
Ccajan37270	Mung bean	Vradi10g07810.1	678	3e-90	94	90	237
Ccajan37354	Mung bean	Vradi02g08860.1	848	8e-115	89	99	276
Ccajan37547	Mung bean	Vradi02g07950.1	338	2e-42	92	1	73
Ccajan37572	Mung bean	Vradi07g14850.1	747	1e-100	84	5	187
Ccajan37776	Mung bean	Vradi0083s00280.1	997	6e-132	83	378	611
Ccajan38005	Mung bean	Vradi05g21870.1	801	1e-107	99	1	145
Ccajan38126	Mung bean	Vradi08g09530.1	1367	0	86	293	596
Ccajan38710	Mung bean	Vradi07g00610.1	313	1e-38	88	1	66
Ccajan38912	Mung bean	Vradi07g16030.1	586	2e-75	89	1	120
Ccajan38974	Mung bean	Vradi01g01810.1	299	5e-34	95	1	59
Ccajan39617	Mung bean	Vradi0361s00030.1	547	9e-72	97	1	105
Ccajan40210	Mung bean	Vradi01g09720.1	388	5e-46	81	1	99
Ccajan40217	Mung bean	Vradi07g30030.1	330	8e-40	98	1	61
Ccajan40279	Mung bean	Vradi0007s02580.1	304	2e-34	85	1	71
Ccajan40589	Mung bean	Vradi08g14650.1	449	2e-56	87	1	87
Ccajan4333	Mung bean	Vradi03g05810.1	2241	0	87	36	502
Ccajan4299	Mung bean	Vradi07g27680.1	1698	0	88	1	369
Ccajan4127	Mung bean	Vradi04g08830.1	1527	0	82	147	501
Ccajan41284	Mung bean	Vradi11g13410.1	432	1e-53	89	1	88
Ccajan43085	Mung bean	Vradi11g13410.1	189	4e-19	81	1	42
Ccajan43283	Mung bean	Vradi11g09130.1	288	3e-33	98	1	60
Ccajan44027	Mung bean	Vradi0083s00280.1	1028	1e-136	85	378	611
Ccajan45191	Mung bean	Vradi08g14650.1	490	2e-62	96	1	92
Ccajan45255	Mung bean	Vradi01g05590.1	703	2e-91	91	39	175
Ccajan45576	Mung bean	Vradi01g12230.1	194	5e-20	93	63	106
Ccajan4643	Mung bean	Vradi06g02570.1	3862	0	91	1	831
Ccajan47586	Mung bean	Vradi07g19460.1	370	9e-45	88	87	174
Ccajan47792	Mung bean	Vradi02g06530.1	526	8e-63	88	28	133
Ccajan5984	Mung bean	Vradi0273s00180.1	4269	0	83	1	965
Ccajan9847	Mung bean	Vradi02g06530.1	4240	0	85	28	991
Ccajan8922	Mung bean	Vradi0070s00130.1	3962	0	87	1	827
Ccajan8009	Mung bean	Vradi0043s00060.1	3765	0	84	55	873
Ccajan9697	Mung bean	Vradi01g03030.1	3625	0	89	55	895
Ccajan9899	Mung bean	Vradi08g01130.1	2867	0	86	1	650
Ccajan9665	Mung bean	Vradi03g01510.1	2833	0	82	1	643
Ccajan9176	Mung bean	Vradi07g30610.1	2721	0	84	1	600
Ccajan8541	Mung bean	Vradi06g16770.1	2318	0	87	1	552
Ccajan6261	Mung bean	Vradi0146s00200.1	2270	0	81	110	585
Ccajan5798	Mung bean	Vradi08g05950.1	2196	0	85	1	485
Ccajan6513	Mung bean	Vradi06g11700.1	2143	0	85	1	504
Ccajan6318	Mung bean	Vradi0111s00010.1	2141	0	86	90	560
Ccajan7053	Mung bean	Vradi02g01930.1	2110	0	91	49	487
Ccajan9062	Mung bean	Vradi02g07100.1	2108	0	83	1	520
Ccajan8204	Mung bean	Vradi08g07630.1	2107	0	81	1	481
Ccajan5886	Mung bean	Vradi0158s00480.1	2039	0	81	1	526
Ccajan5327	Mung bean	Vradi0161s00040.1	1923	0	88	1	402
Ccajan4892	Mung bean	Vradi02g01930.1	1907	0	81	49	487
Ccajan5138	Mung bean	Vradi10g10490.1	1900	0	89	35	436
Ccajan9158	Mung bean	Vradi07g05750.1	1809	0	83	44	454
Ccajan6251	Mung bean	Vradi02g12120.1	1809	0	86	1	395
Ccajan6638	Mung bean	Vradi07g22280.1	1742	0	85	14	419
Ccajan5161	Mung bean	Vradi07g11270.1	1740	0	91	1	352
Ccajan8411	Mung bean	Vradi01g12350.1	1682	0	86	63	442
Ccajan5802	Mung bean	Vradi05g18650.1	1677	0	91	5	340
Ccajan9361	Mung bean	Vradi0146s00220.1	1670	0	88	1	364
Ccajan6964	Mung bean	Vradi07g00380.1	1585	0	91	1	332
Ccajan5717	Mung bean	Vradi11g03530.1	1579	0	83	1	364
Ccajan6449	Mung bean	Vradi03g01100.1	1519	0	85	1	363
Ccajan6605	Mung bean	Vradi05g16860.1	1507	0	84	25	363
Ccajan7313	Mung bean	Vradi03g00030.1	1488	0	93	131	436
Ccajan5164	Mung bean	Vradi07g11480.1	1474	0	81	1	371
Ccajan8421	Mung bean	Vradi11g09040.1	1466	0	89	1	331
Ccajan5492	Mung bean	Vradi07g18170.1	1451	0	90	1	295
Ccajan9543	Mung bean	Vradi10g11920.1	1402	0	81	18	350
Ccajan8114	Mung bean	Vradi10g07010.1	1371	0	88	444	737
Ccajan9122	Mung bean	Vradi06g04760.1	1370	0	88	3	291
Ccajan9710	Mung bean	Vradi02g12880.1	1313	0	90	78	362
Ccajan6861	Mung bean	Vradi11g08310.1	1292	0	89	1	268
Ccajan6402	Mung bean	Vradi11g04420.1	1295	1e-179	85	41	342
Ccajan7985	Mung bean	Vradi01g05570.1	1286	3e-179	89	16	298
Ccajan7986	Mung bean	Vradi01g05570.1	1284	5e-179	89	16	298
Ccajan5561	Mung bean	Vradi0332s00010.1	1263	6e-177	93	1	254
Ccajan4274	Mung bean	Vradi03g10130.1	1243	1e-173	92	21	272
Ccajan1432	Mung bean	Vradi05g21680.1	1242	5e-171	89	1	262
Ccajan3550	Mung bean	Vradi07g10830.1	1231	5e-171	84	2	288
Ccajan5965	Mung bean	Vradi02g02890.1	1227	1e-169	89	63	324
Ccajan5263	Mung bean	Vradi08g18910.1	1263	2e-169	83	385	688
Ccajan5129	Mung bean	Vradi06g02880.1	1202	3e-167	84	1	257
Ccajan3262	Mung bean	Vradi07g08720.1	1174	1e-163	90	1	245
Ccajan2556	Mung bean	Vradi06g10670.1	1294	4e-163	84	1770	2066
Ccajan9179	Mung bean	Vradi11g04980.1	1174	7e-162	82	1	298
Ccajan2566	Mung bean	Vradi04g10750.1	1178	9e-162	83	46	334
Ccajan4353	Mung bean	Vradi11g06340.1	1161	2e-160	86	2	283
Ccajan1170	Mung bean	Vradi01g04660.1	1143	1e-158	88	1	243
Ccajan6248	Mung bean	Vradi0070s00170.1	1161	1e-157	86	1	256
Ccajan5660	Mung bean	Vradi11g02760.1	1136	3e-157	83	1	265
Ccajan8885	Mung bean	Vradi03g00740.1	1155	2e-155	82	310	571
Ccajan3626	Mung bean	Vradi04g01640.1	1108	6e-152	84	1	252
Ccajan3205	Mung bean	Vradi02g04430.1	1100	3e-151	90	10	230
Ccajan1720	Mung bean	Vradi0332s00260.1	1110	1e-149	90	1	228
Ccajan7552	Mung bean	Vradi07g10140.1	1073	2e-146	91	45	288
Ccajan4573	Mung bean	Vradi08g02530.1	1053	3e-145	85	1	248
Ccajan1243	Mung bean	Vradi05g17640.1	1106	6e-145	85	176	414
Ccajan2599	Mung bean	Vradi08g21650.1	1038	3e-143	81	1	241
Ccajan9403	Mung bean	Vradi05g21390.1	1037	7e-142	83	1	252
Ccajan6026	Mung bean	Vradi08g15940.1	1090	2e-141	86	1	239
Ccajan3628	Mung bean	Vradi04g01660.1	1051	3e-140	90	14	223
Ccajan7608	Mung bean	Vradi0179s00040.1	999	6e-137	81	1	240
Ccajan5132	Mung bean	Vradi0473s00050.1	955	4e-132	95	3	190
Ccajan2498	Mung bean	Vradi07g23190.1	960	7e-132	85	14	230
Ccajan0735	Mung bean	Vradi07g12330.1	966	1e-130	81	95	327
Ccajan9976	Mung bean	Vradi05g12610.1	910	4e-124	81	4	225
Ccajan3346	Mung bean	Vradi03g01490.1	900	5e-123	87	2	207
Ccajan6632	Mung bean	Vradi05g14520.1	859	4e-117	81	1	197
Ccajan3959	Mung bean	Vradi05g22200.1	847	5e-115	89	1	176
Ccajan7084	Mung bean	Vradi05g16390.1	838	1e-114	87	1	187
Ccajan6237	Mung bean	Vradi04g02650.1	840	2e-114	85	1	196
Ccajan1304	Mung bean	Vradi08g17110.1	839	1e-113	91	1	219
Ccajan6390	Mung bean	Vradi11g12950.1	841	4e-113	96	1	173
Ccajan5572	Mung bean	Vradi0380s00130.1	829	9e-113	83	2	199
Ccajan7218	Mung bean	Vradi04g09800.1	822	9e-112	88	1	195
Ccajan1041	Mung bean	Vradi07g02270.1	838	2e-111	88	233	412
Ccajan8097	Mung bean	Vradi02g05560.1	807	2e-109	91	39	204
Ccajan8944	Mung bean	Vradi06g04290.1	786	6e-107	83	1	181
Ccajan8614	Mung bean	Vradi09g01810.1	791	8e-107	81	1	207
Ccajan8072	Mung bean	Vradi06g04710.1	785	1e-106	82	1	184
Ccajan7402	Mung bean	Vradi07g12770.1	791	4e-105	99	51	194
Ccajan0266	Mung bean	Vradi03g02400.1	778	1e-104	82	1	192
Ccajan4752	Mung bean	Vradi0228s00170.1	763	3e-104	99	9	157
Ccajan9537	Mung bean	Vradi11g11530.1	789	3e-103	90	290	454
Ccajan9255	Mung bean	Vradi08g14940.1	754	5e-102	83	1	181
Ccajan8507	Mung bean	Vradi08g06840.1	776	1e-101	82	1	203
Ccajan0327	Mung bean	Vradi10g04910.1	752	4e-100	91	38	196
Ccajan6055	Mung bean	Vradi0170s00120.1	749	7e-99	93	1	145
Ccajan6729	Mung bean	Vradi10g08350.1	731	2e-98	92	1	165
Ccajan3319	Mung bean	Vradi07g29850.1	755	1e-97	89	6	161
Ccajan6696	Mung bean	Vradi06g04290.1	725	1e-97	81	1	181
Ccajan8325	Mung bean	Vradi01g12230.1	697	3e-90	96	63	213
Ccajan4003	Mung bean	Vradi05g05520.1	662	1e-87	100	1	124
Ccajan8385	Mung bean	Vradi05g10480.1	658	2e-87	88	1	161
Ccajan4846	Mung bean	Vradi0086s00500.1	691	2e-85	92	235	375
Ccajan9224	Mung bean	Vradi10g10680.1	640	4e-85	83	11	169
Ccajan4875	Mung bean	Vradi08g08840.1	665	5e-85	90	98	230
Ccajan5901	Mung bean	Vradi0161s00350.1	655	1e-84	88	1	143
Ccajan3492	Mung bean	Vradi0184s00090.1	645	5e-84	98	1	123
Ccajan0208	Mung bean	Vradi08g20910.1	611	1e-78	100	4	112
Ccajan4788	Mung bean	Vradi08g15530.1	579	6e-76	92	1	118
Ccajan3287	Mung bean	Vradi09g05300.1	578	4e-73	86	1	134
Ccajan4286	Mung bean	Vradi02g04430.1	561	9e-73	83	86	206
Ccajan4335	Mung bean	Vradi03g05800.1	624	1e-71	84	412	558
Ccajan4666	Mung bean	Vradi01g10980.1	549	8e-70	90	17	138
Ccajan5709	Mung bean	Vradi07g25390.1	532	8e-70	81	2	124
Ccajan7354	Mung bean	Vradi07g12760.1	531	4e-68	94	37	144
Ccajan3628	Mung bean	Vradi04g01660.1	565	2e-67	88	213	341
Ccajan9657	Mung bean	Vradi06g14460.1	506	7e-66	82	2	122
Ccajan0231	Mung bean	Vradi0381s00020.1	559	1e-65	86	1	120
Ccajan1117	Mung bean	Vradi0373s00110.1	518	1e-65	83	34	147
Ccajan6501	Mung bean	Vradi07g25440.1	611	2e-65	91	1	124
Ccajan6947	Mung bean	Vradi0361s00030.1	502	4e-65	91	1	105
Ccajan6650	Mung bean	Vradi02g10520.1	502	6e-64	90	1	107
Ccajan8822	Mung bean	Vradi04g08920.1	493	4e-62	96	34	122
Ccajan9549	Mung bean	Vradi0023s00350.1	488	2e-60	82	1	130
Ccajan1669	Mung bean	Vradi03g04880.1	468	2e-58	82	1	109
Ccajan9074	Mung bean	Vradi08g15440.1	461	6e-57	97	1	87
Ccajan7260	Mung bean	Vradi05g00550.1	470	3e-55	83	62	164
Ccajan8386	Mung bean	Vradi05g13240.1	417	1e-53	81	1	97
Ccajan3506	Mung bean	Vradi07g22100.1	426	2e-53	84	17	122
Ccajan9697	Mung bean	Vradi01g03030.1	509	8e-53	81	865	978
Ccajan0719	Mung bean	Vradi07g13770.1	432	6e-51	97	1	86
Ccajan7092	Mung bean	Vradi11g03660.1	388	6e-49	89	45	128
Ccajan3169	Mung bean	Vradi11g10120.1	433	8e-48	84	73	165
Ccajan2284	Mung bean	Vradi02g04720.1	400	4e-47	93	54	138
Ccajan3319	Mung bean	Vradi07g29850.1	401	4e-45	88	215	300
Ccajan7268	Mung bean	Vradi06g01720.1	355	2e-43	91	3	71
Ccajan0147	Mung bean	Vradi05g05790.1	437	3e-43	89	11	100
Ccajan2734	Mung bean	Vradi04g08690.1	345	6e-43	81	1	83
Ccajan5657	Mung bean	Vradi07g10520.1	356	2e-42	93	1	70
Ccajan5937	Mung bean	Vradi07g00610.1	337	3e-42	93	1	69
Ccajan9549	Mung bean	Vradi0023s00350.1	356	6e-41	85	119	196
Ccajan5063	Mung bean	Vradi07g03660.1	342	2e-39	83	1	108
Ccajan2723	Mung bean	Vradi07g16260.1	330	2e-39	88	3	69
Ccajan2733	Mung bean	Vradi0043s00400.1	320	4e-38	92	22	97
Ccajan8331	Mung bean	Vradi08g19210.1	293	1e-33	95	1	60
Ccajan0507	Mung bean	Vradi0189s00040.1	291	1e-33	93	1	60
Ccajan3685	Mung bean	Vradi0133s00310.1	335	2e-33	85	35	137
Ccajan9411	Mung bean	Vradi05g06820.1	264	6e-28	81	105	163
Ccajan8325	Mung bean	Vradi01g12230.1	228	6e-22	90	1	62
Ccajan9165	Mung bean	Vradi02g04340.1	157	1e-11	94	11	41
Ccajan2572	Mung bean	Vradi11g10120.1	157	2e-11	86	329	365
Ccajan6909	Mung bean	Vradi06g14040.1	126	2e-08	96	244	266
Ccajan6650	Mung bean	Vradi02g10520.1	100	1e-05	87	104	125
Ccajan4666	Mung bean	Vradi01g10980.1	95	9e-05	95	1	19
Ccajan3205	Mung bean	Vradi02g04430.1	72	0.25	93	1	14
Ccajan0129	Adzuki bean	Vang06g02190.1	3826	0	89	1	794
Ccajan0710	Adzuki bean	Vang03g17430.1	2465	0	89	53	593
Ccajan0545	Adzuki bean	Vang03g05320.1	2315	0	88	430	926
Ccajan0421	Adzuki bean	Vang09g01900.1	2216	0	85	1	527
Ccajan0091	Adzuki bean	Vang1010s00010.2	2165	0	85	69	548
Ccajan0557	Adzuki bean	Vang01g01360.1	2103	0	88	100	538
Ccajan0790	Adzuki bean	Vang0156s00080.2	2050	0	85	20	484
Ccajan0205	Adzuki bean	Vang05g01450.1	1812	0	88	12	425
Ccajan0147	Adzuki bean	Vang0052ss00070.1	1746	0	91	200	540
Ccajan0606	Adzuki bean	Vang0032ss01930.1	1707	0	84	14	388
Ccajan0399	Adzuki bean	Vang05g06050.1	1652	0	82	5	390
Ccajan0011	Adzuki bean	Vang10g02020.2	1365	0	84	50	376
Ccajan0246	Adzuki bean	Vang07g06070.1	1217	3e-163	87	83	348
Ccajan0327	Adzuki bean	Vang06g10140.3	1138	2e-157	89	1	253
Ccajan0801	Adzuki bean	Vang01g05030.1	1115	8e-154	85	19	277
Ccajan0248	Adzuki bean	Vang07g06130.1	1121	3e-153	83	18	292
Ccajan0297	Adzuki bean	Vang07g04040.1	1057	4e-143	82	1	272
Ccajan0735	Adzuki bean	Vang11g05900.1	977	6e-133	82	53	282
Ccajan0266	Adzuki bean	Vang07g05460.1	853	8e-115	84	54	255
Ccajan10072	Adzuki bean	Vang0022ss01080.1	1249	3e-173	82	1	288
Ccajan10081	Adzuki bean	Vang0162s00120.1	1311	0	82	17	335
Ccajan10087	Adzuki bean	Vang06g08980.4	1124	5e-155	89	1	237
Ccajan10106	Adzuki bean	Vang02g09080.1	1461	0	88	1	316
Ccajan10147	Adzuki bean	Vang0308s00210.1	1003	3e-138	83	1	223
Ccajan10163	Adzuki bean	Vang02g10450.1	553	4e-68	82	119	256
Ccajan10217	Adzuki bean	Vang0183s00090.1	2682	0	85	1	606
Ccajan10406	Adzuki bean	Vang05g06600.1	3155	0	88	10	716
Ccajan10438	Adzuki bean	Vang0198s00010.1	2517	0	84	1	582
Ccajan10455	Adzuki bean	Vang0021ss00470.1	1911	0	87	34	435
Ccajan10492	Adzuki bean	Vang04g12130.1	845	3e-116	97	1	162
Ccajan10495	Adzuki bean	Vang04g04260.3	1856	0	85	30	443
Ccajan10528	Adzuki bean	Vang10g03470.1	3375	0	82	1	811
Ccajan10548	Adzuki bean	Vang0022ss02460.1	1174	1e-161	84	47	316
Ccajan10652	Adzuki bean	Vang02g06670.1	1476	0	81	82	462
Ccajan10707	Adzuki bean	Vang11g04720.2	788	2e-105	93	1	158
Ccajan10723	Adzuki bean	Vang01g05280.1	296	2e-32	100	1	51
Ccajan10724	Adzuki bean	Vang01g05280.1	303	2e-33	98	1	52
Ccajan10824	Adzuki bean	Vang04g08110.1	2161	0	87	8	476
Ccajan10904	Adzuki bean	Vang0697s00020.1	1364	0	81	11	342
Ccajan10906	Adzuki bean	Vang0070s00260.1	1375	0	86	47	326
Ccajan10969	Adzuki bean	Vang07g07380.1	428	2e-50	91	103	202
Ccajan10969	Adzuki bean	Vang07g07380.1	181	1e-15	90	17	55
Ccajan11226	Adzuki bean	Vang01g06790.1	1954	0	88	36	460
Ccajan11282	Adzuki bean	Vang01g05410.1	1174	4e-162	89	61	317
Ccajan11330	Adzuki bean	Vang11g06900.1	869	1e-117	93	1	194
Ccajan11355	Adzuki bean	Vang05g07370.1	995	5e-134	89	54	265
Ccajan11355	Adzuki bean	Vang05g07370.1	299	9e-31	98	1	55
Ccajan1139	Adzuki bean	Vang0058ss00700.1	1281	8e-177	84	1	298
Ccajan1141	Adzuki bean	Vang0010ss03090.1	1021	2e-140	81	1	240
Ccajan11412	Adzuki bean	Vang09g02240.1	394	4e-50	94	10	92
Ccajan11522	Adzuki bean	Vang11g06000.1	620	3e-81	82	1	157
Ccajan11659	Adzuki bean	Vang04g14650.1	2139	0	86	3	475
Ccajan1170	Adzuki bean	Vang02g05040.1	1308	0	89	1	273
Ccajan11759	Adzuki bean	Vang06g06010.1	2307	0	89	1	505
Ccajan11822	Adzuki bean	Vang0051s00070.1	3129	0	84	2	717
Ccajan11829	Adzuki bean	Vang11g18650.1	2463	0	87	27	548
Ccajan11921	Adzuki bean	Vang11g12820.1	745	2e-98	95	193	336
Ccajan11990	Adzuki bean	Vang02g11940.1	415	2e-47	93	123	213
Ccajan12037	Adzuki bean	Vang03g14800.1	2565	0	88	13	558
Ccajan12178	Adzuki bean	Vang03g18340.2	1014	2e-137	94	44	283
Ccajan12289	Adzuki bean	Vang0690s00020.2	1344	0	83	34	322
Ccajan1231	Adzuki bean	Vang0221s00200.1	1402	0	89	1	323
Ccajan12325	Adzuki bean	Vang0711s00030.1	654	2e-84	81	1	170
Ccajan12422	Adzuki bean	Vang06g17510.1	783	4e-102	95	168	314
Ccajan1243	Adzuki bean	Vang0022ss03970.1	1098	1e-143	87	167	401
Ccajan12432	Adzuki bean	Vang0071ss01100.1	260	2e-25	89	1	52
Ccajan12480	Adzuki bean	Vang0552s00010.1	1066	3e-147	88	1	239
Ccajan12483	Adzuki bean	Vang06g06160.1	1417	0	92	1	338
Ccajan1257	Adzuki bean	Vang0033ss00350.1	1099	1e-150	93	4	254
Ccajan12626	Adzuki bean	Vang02g15370.1	1266	3e-176	93	1	282
Ccajan12659	Adzuki bean	Vang11g18130.4	1240	1e-172	92	1	267
Ccajan12685	Adzuki bean	Vang03g06800.1	1089	1e-147	90	1	297
Ccajan12707	Adzuki bean	Vang0256s00230.1	454	2e-55	86	3	103
Ccajan12707	Adzuki bean	Vang0256s00230.1	224	7e-22	88	107	154
Ccajan1271	Adzuki bean	Vang06g15460.1	1820	0	86	1	434
Ccajan12733	Adzuki bean	Vang01g10880.8	1033	1e-141	89	1	257
Ccajan12787	Adzuki bean	Vang0236s00370.1	1319	0	88	95	386
Ccajan12796	Adzuki bean	Vang02g08740.4	448	9e-57	90	2	99
Ccajan12992	Adzuki bean	Vang0005s01870.1	886	3e-121	88	1	194
Ccajan13013	Adzuki bean	Vang09g06640.1	2193	0	93	100	621
Ccajan13013	Adzuki bean	Vang09g06640.1	1998	0	94	632	1024
Ccajan13020	Adzuki bean	Vang07g00870.1	901	9e-121	83	56	263
Ccajan13020	Adzuki bean	Vang07g00870.1	128	3e-08	86	1	27
Ccajan13024	Adzuki bean	Vang01g03800.1	2158	0	89	10	479
Ccajan13026	Adzuki bean	Vang0332s00070.1	198	9e-20	86	99	142
Ccajan13105	Adzuki bean	Vang11g01930.1	713	4e-91	96	120	254
Ccajan13105	Adzuki bean	Vang11g01930.1	490	5e-58	87	1	122
Ccajan13115	Adzuki bean	Vang0033ss01360.1	1744	0	82	1	404
Ccajan13119	Adzuki bean	Vang0032ss01850.1	796	2e-108	95	17	168
Ccajan13194	Adzuki bean	Vang04g00020.1	996	5e-137	89	7	223
Ccajan13237	Adzuki bean	Vang11g08290.1	1862	0	85	1	440
Ccajan13255	Adzuki bean	Vang0784s00020.1	521	4e-64	86	1	133
Ccajan13264	Adzuki bean	Vang03g02740.2	1082	1e-148	83	4	247
Ccajan13283	Adzuki bean	Vang0575s00010.1	1054	8e-145	96	1	202
Ccajan13373	Adzuki bean	Vang06g07290.1	6795	0	81	1	1631
Ccajan13496	Adzuki bean	Vang07g05470.4	1089	3e-144	86	148	377
Ccajan13527	Adzuki bean	Vang04g17720.1	1414	0	91	28	329
Ccajan13528	Adzuki bean	Vang10g06430.1	1338	0	82	1	304
Ccajan13554	Adzuki bean	Vang05g02130.1	401	9e-51	94	2	81
Ccajan13599	Adzuki bean	Vang0051s00030.1	1177	6e-162	91	1	246
Ccajan1572	Adzuki bean	Vang06g00670.1	1813	0	87	39	462
Ccajan1393	Adzuki bean	Vang0071ss00630.1	1552	0	87	271	603
Ccajan1441	Adzuki bean	Vang04g13640.2	1303	0	91	1	277
Ccajan1720	Adzuki bean	Vang0058ss00600.1	1097	5e-148	88	1	232
Ccajan1041	Adzuki bean	Vang11g01250.1	830	3e-110	88	216	395
Ccajan0208	Adzuki bean	Vang06g01270.1	732	4e-94	83	144	284
Ccajan0956	Adzuki bean	Vang0022ss01040.1	615	2e-79	88	1	133
Ccajan1117	Adzuki bean	Vang0374s00180.1	525	1e-66	84	34	147
Ccajan0231	Adzuki bean	Vang0374s00060.1	506	6e-57	93	119	217
Ccajan0719	Adzuki bean	Vang0064ss00300.1	437	3e-55	97	1	86
Ccajan0147	Adzuki bean	Vang0052ss00070.1	437	4e-43	89	36	125
Ccajan0507	Adzuki bean	Vang09g03520.1	319	1e-37	100	1	61
Ccajan0586	Adzuki bean	Vang0521s00040.2	273	6e-31	91	15	78
Ccajan13782	Adzuki bean	Vang07g04300.1	758	1e-101	99	143	285
Ccajan13783	Adzuki bean	Vang0134s00650.1	2624	0	89	22	587
Ccajan13798	Adzuki bean	Vang05g09220.1	741	6e-97	94	262	406
Ccajan13824	Adzuki bean	Vang02g01130.1	755	4e-100	100	38	171
Ccajan13877	Adzuki bean	Vang0164s00380.1	1728	0	84	12	386
Ccajan14050	Adzuki bean	Vang11g02770.1	866	1e-116	86	115	309
Ccajan14088	Adzuki bean	Vang11g07370.1	2047	0	84	55	516
Ccajan14134	Adzuki bean	Vang06g16250.1	440	5e-57	93	1	88
Ccajan14154	Adzuki bean	Vang05g02710.2	1745	0	95	8	344
Ccajan14226	Adzuki bean	Vang02g15460.1	1359	0	84	1	319
Ccajan14272	Adzuki bean	Vang03g06500.1	1499	0	81	1	363
Ccajan14365	Adzuki bean	Vang0030ss00230.2	4295	0	96	79	913
Ccajan14394	Adzuki bean	Vang0143s00190.1	285	7e-28	90	14	71
Ccajan14428	Adzuki bean	Vang0112s00330.1	729	4e-96	81	8	208
Ccajan14446	Adzuki bean	Vang01g02030.1	720	3e-95	83	1	150
Ccajan14478	Adzuki bean	Vang0134s00400.1	1051	7e-142	87	1	225
Ccajan14509	Adzuki bean	Vang05g07260.1	312	2e-37	97	1	63
Ccajan14511	Adzuki bean	Vang05g07280.1	797	5e-106	95	5	154
Ccajan14530	Adzuki bean	Vang06g07490.1	1428	0	86	40	392
Ccajan14632	Adzuki bean	Vang0065s00550.2	1404	0	94	1	285
Ccajan14657	Adzuki bean	Vang0789s00080.1	505	2e-64	93	1	107
Ccajan14661	Adzuki bean	Vang0126s00200.1	521	2e-63	91	24	133
Ccajan14709	Adzuki bean	Vang03g10190.1	109	1e-07	88	105	128
Ccajan14735	Adzuki bean	Vang04g06610.1	4029	0	93	32	823
Ccajan14741	Adzuki bean	Vang11g18560.1	635	3e-85	90	1	132
Ccajan14847	Adzuki bean	Vang0268s00320.1	1171	2e-162	87	1	261
Ccajan14874	Adzuki bean	Vang0063ss00950.1	1289	8e-179	82	1	306
Ccajan14888	Adzuki bean	Vang03g11990.1	1366	0	84	33	344
Ccajan14921	Adzuki bean	Vang1236s00010.1	369	5e-43	87	89	167
Ccajan14985	Adzuki bean	Vang0065s00530.1	398	1e-50	94	10	93
Ccajan14997	Adzuki bean	Vang0005s00670.1	1262	9e-175	88	1	261
Ccajan15065	Adzuki bean	Vang09g04480.1	1712	0	83	35	457
Ccajan15173	Adzuki bean	Vang0228s00230.1	720	8e-95	83	147	318
Ccajan15248	Adzuki bean	Vang07g02810.1	298	2e-33	92	1	61
Ccajan15360	Adzuki bean	Vang0022ss00880.1	248	1e-26	93	1	46
Ccajan15548	Adzuki bean	Vang0190s00310.1	458	4e-56	82	1	113
Ccajan15569	Adzuki bean	Vang0057s00320.1	297	4e-34	95	1	60
Ccajan15610	Adzuki bean	Vang06g14860.2	1280	1e-177	85	6	299
Ccajan15612	Adzuki bean	Vang0333s00130.1	536	4e-67	96	16	115
Ccajan15612	Adzuki bean	Vang0333s00130.1	75	0.083	87	1	15
Ccajan15613	Adzuki bean	Vang0419s00040.1	1411	0	82	1	338
Ccajan15737	Adzuki bean	Vang0039ss00390.2	3405	0	87	1	746
Ccajan15894	Adzuki bean	Vang06g05210.1	980	3e-120	88	587	797
Ccajan15895	Adzuki bean	Vang01g18260.2	2037	0	90	32	458
Ccajan15906	Adzuki bean	Vang04g01000.1	1340	0	86	58	357
Ccajan15938	Adzuki bean	Vang04g05780.1	1469	0	86	389	712
Ccajan15956	Adzuki bean	Vang11g11080.1	2261	0	82	1	562
Ccajan16045	Adzuki bean	Vang09g02290.1	1442	0	89	30	382
Ccajan16052	Adzuki bean	Vang0112s00180.1	864	4e-113	89	87	282
Ccajan16053	Adzuki bean	Vang0004ss01090.1	1310	0	89	1	300
Ccajan16069	Adzuki bean	Vang01g16660.1	1394	0	86	1	333
Ccajan16087	Adzuki bean	Vang0259s00170.2	302	2e-34	97	1	61
Ccajan16100	Adzuki bean	Vang02g09500.1	2304	0	84	99	610
Ccajan16112	Adzuki bean	Vang0349s00210.1	2407	0	87	3	522
Ccajan16131	Adzuki bean	Vang10g00110.1	547	2e-71	90	1	114
Ccajan16173	Adzuki bean	Vang0057s00060.1	1302	7e-180	82	1	341
Ccajan16231	Adzuki bean	Vang0869s00010.2	1318	0	83	33	362
Ccajan16320	Adzuki bean	Vang01g18880.1	971	5e-133	83	17	240
Ccajan16394	Adzuki bean	Vang08g06450.2	281	2e-32	96	97	150
Ccajan16420	Adzuki bean	Vang0268s00300.1	1751	0	85	1	482
Ccajan16578	Adzuki bean	Vang04g13290.1	694	1e-88	82	50	222
Ccajan16649	Adzuki bean	Vang0021ss00200.2	1468	0	86	1	345
Ccajan16716	Adzuki bean	Vang0476s00010.1	799	9e-107	90	1	166
Ccajan16718	Adzuki bean	Vang10g01210.1	1877	0	82	13	483
Ccajan16892	Adzuki bean	Vang04g07780.1	1652	0	99	168	479
Ccajan16892	Adzuki bean	Vang04g07780.1	327	1e-31	83	90	169
Ccajan16915	Adzuki bean	Vang01g16470.1	1746	0	85	1	407
Ccajan17087	Adzuki bean	Vang08g04450.1	479	2e-59	89	27	128
Ccajan17111	Adzuki bean	Vang0110s00030.1	1221	1e-165	81	150	482
Ccajan17118	Adzuki bean	Vang11g07450.1	1326	0	85	24	316
Ccajan17291	Adzuki bean	Vang03g05010.1	1648	0	82	1	384
Ccajan17318	Adzuki bean	Vang04g06390.2	3071	0	87	22	669
Ccajan17344	Adzuki bean	Vang01g07670.1	1269	5e-175	86	1	304
Ccajan17350	Adzuki bean	Vang07g02130.1	862	3e-116	84	1	244
Ccajan17474	Adzuki bean	Vang02g15470.1	434	3e-56	94	1	88
Ccajan17671	Adzuki bean	Vang0011ss00240.1	3567	0	92	30	716
Ccajan17753	Adzuki bean	Vang0347s00020.1	1694	0	96	20	354
Ccajan17761	Adzuki bean	Vang06g09890.6	487	1e-62	82	1	142
Ccajan17789	Adzuki bean	Vang09g04960.1	757	4e-100	99	208	350
Ccajan17910	Adzuki bean	Vang0063ss00640.1	1005	3e-138	82	1	229
Ccajan1807	Adzuki bean	Vang01g02950.3	625	4e-78	81	265	408
Ccajan18109	Adzuki bean	Vang01g06710.1	649	3e-85	81	1	204
Ccajan18131	Adzuki bean	Vang0069ss01820.1	1391	0	90	1	295
Ccajan18213	Adzuki bean	Vang0057ss01020.1	1835	0	87	20	425
Ccajan18213	Adzuki bean	Vang0057ss01020.1	797	8e-93	92	665	830
Ccajan18218	Adzuki bean	Vang01g09790.1	1245	3e-169	87	1	262
Ccajan18240	Adzuki bean	Vang0033ss01740.1	1227	5e-170	97	76	316
Ccajan18242	Adzuki bean	Vang0184s00190.1	724	2e-93	84	20	173
Ccajan18274	Adzuki bean	Vang06g13850.1	419	6e-52	81	1	89
Ccajan18284	Adzuki bean	Vang02g00210.1	1554	0	86	1	352
Ccajan18360	Adzuki bean	Vang0005s01200.8	1434	0	84	1	347
Ccajan18378	Adzuki bean	Vang04g05870.1	1284	5e-177	82	14	329
Ccajan18401	Adzuki bean	Vang02g10420.1	480	2e-58	86	4	106
Ccajan18643	Adzuki bean	Vang0070s00100.1	462	8e-58	93	1	88
Ccajan18666	Adzuki bean	Vang01g04940.1	2999	0	88	1	670
Ccajan18675	Adzuki bean	Vang0143s00280.1	192	1e-19	92	2	37
Ccajan18703	Adzuki bean	Vang08g02820.2	1452	0	86	1	330
Ccajan18707	Adzuki bean	Vang09g02890.1	415	2e-51	87	1	87
Ccajan19044	Adzuki bean	Vang11g12140.1	880	2e-117	83	140	351
Ccajan19071	Adzuki bean	Vang0021ss02160.1	3052	0	87	1	694
Ccajan19084	Adzuki bean	Vang11g09140.1	1847	0	84	86	518
Ccajan19089	Adzuki bean	Vang03g02070.1	1497	0	84	1	373
Ccajan19151	Adzuki bean	Vang10g06010.1	1710	0	86	1	361
Ccajan19189	Adzuki bean	Vang0323s00120.1	1175	1e-161	81	21	334
Ccajan19246	Adzuki bean	Vang0030ss00230.1	2104	0	85	96	554
Ccajan19246	Adzuki bean	Vang0030ss00230.1	1201	2e-151	92	640	884
Ccajan19287	Adzuki bean	Vang0022ss04360.1	855	1e-113	89	75	252
Ccajan19287	Adzuki bean	Vang0022ss04360.1	301	2e-31	98	1	56
Ccajan19293	Adzuki bean	Vang02g09420.1	2095	0	90	1	463
Ccajan19333	Adzuki bean	Vang0022ss03100.1	922	7e-123	81	30	256
Ccajan19333	Adzuki bean	Vang0022ss03100.1	156	1e-11	97	1	31
Ccajan19359	Adzuki bean	Vang06g04690.1	3535	0	90	26	783
Ccajan19493	Adzuki bean	Vang0065s00530.1	406	8e-52	96	10	93
Ccajan19555	Adzuki bean	Vang0022ss00880.1	236	3e-25	89	1	46
Ccajan19634	Adzuki bean	Vang0070s00380.1	1048	6e-145	94	1	210
Ccajan19657	Adzuki bean	Vang0941s00010.1	3241	0	88	4	681
Ccajan19708	Adzuki bean	Vang11g08920.1	1518	0	81	1	369
Ccajan19912	Adzuki bean	Vang04g12030.1	553	8e-71	83	90	217
Ccajan19968	Adzuki bean	Vang09g02950.1	728	2e-97	88	3	192
Ccajan19997	Adzuki bean	Vang0022ss01320.1	1093	7e-150	85	7	240
Ccajan20076	Adzuki bean	Vang06g20150.1	661	2e-87	84	1	150
Ccajan20186	Adzuki bean	Vang0145s00630.1	717	7e-95	87	1	157
Ccajan20205	Adzuki bean	Vang06g15280.1	1565	0	81	1	371
Ccajan20215	Adzuki bean	Vang07g02210.1	625	1e-82	84	10	172
Ccajan20326	Adzuki bean	Vang01g00540.2	1081	1e-145	83	9	263
Ccajan20338	Adzuki bean	Vang06g10140.3	1012	2e-138	82	1	253
Ccajan1894	Adzuki bean	Vang04g05220.1	961	2e-130	82	6	241
Ccajan20388	Adzuki bean	Vang0824s00040.1	402	2e-49	83	1	88
Ccajan20392	Adzuki bean	Vang04g12130.1	387	7e-48	89	1	81
Ccajan20399	Adzuki bean	Vang0524s00010.1	1579	0	87	2	351
Ccajan20403	Adzuki bean	Vang01g08860.1	2932	0	83	35	694
Ccajan20436	Adzuki bean	Vang0162s00010.1	1783	0	92	6	375
Ccajan20453	Adzuki bean	Vang0229s00150.1	1234	1e-171	86	8	271
Ccajan2047	Adzuki bean	Vang04g01660.1	1130	2e-155	81	43	309
Ccajan20543	Adzuki bean	Vang06g05160.1	787	8e-103	86	1	174
Ccajan20576	Adzuki bean	Vang0378s00150.1	923	5e-127	98	1	178
Ccajan20594	Adzuki bean	Vang10g03960.1	1006	3e-137	81	55	295
Ccajan20730	Adzuki bean	Vang04g16950.1	952	1e-129	86	52	276
Ccajan20769	Adzuki bean	Vang11g03070.1	1362	0	90	40	337
Ccajan20809	Adzuki bean	Vang01g07460.1	902	5e-122	93	60	240
Ccajan20824	Adzuki bean	Vang09g03680.1	541	4e-70	95	10	117
Ccajan20852	Adzuki bean	Vang0143s00290.1	587	4e-71	91	1	116
Ccajan20889	Adzuki bean	Vang02g07530.1	539	8e-68	85	3	119
Ccajan20909	Adzuki bean	Vang04g01810.1	572	2e-74	89	54	190
Ccajan20936	Adzuki bean	Vang06g23040.1	390	1e-48	86	1	86
Ccajan20938	Adzuki bean	Vang0070s00380.1	313	1e-36	98	1	61
Ccajan21046	Adzuki bean	Vang04g11970.3	3143	0	86	1	741
Ccajan21197	Adzuki bean	Vang0021ss02410.1	1124	6e-154	82	1	281
Ccajan21294	Adzuki bean	Vang09g03520.1	132	2e-10	87	2	32
Ccajan21330	Adzuki bean	Vang11g05230.1	1578	0	85	32	374
Ccajan21356	Adzuki bean	Vang0248s00160.1	2801	0	85	11	607
Ccajan21415	Adzuki bean	Vang0017s00770.1	1557	0	92	10	341
Ccajan21520	Adzuki bean	Vang11g02160.1	1855	0	84	231	649
Ccajan21520	Adzuki bean	Vang11g02160.1	358	3e-36	86	3	86
Ccajan21575	Adzuki bean	Vang10g02560.1	1477	0	87	1	320
Ccajan21635	Adzuki bean	Vang01g04370.2	1428	0	82	63	477
Ccajan21666	Adzuki bean	Vang0636s00080.1	912	1e-125	89	1	194
Ccajan21672	Adzuki bean	Vang01g09960.2	1794	0	89	1	410
Ccajan21724	Adzuki bean	Vang0058ss00620.1	4020	0	82	7	959
Ccajan21775	Adzuki bean	Vang07g08640.1	1313	3e-168	95	596	849
Ccajan21816	Adzuki bean	Vang0974s00030.1	1368	0	87	38	323
Ccajan21818	Adzuki bean	Vang04g05590.1	405	1e-51	88	1	97
Ccajan21851	Adzuki bean	Vang04g12490.1	691	1e-89	87	218	363
Ccajan21862	Adzuki bean	Vang03g03130.1	4276	0	94	1	853
Ccajan2194	Adzuki bean	Vang06g06980.1	2282	0	85	1	498
Ccajan21941	Adzuki bean	Vang0114s00150.1	1031	2e-135	93	1	204
Ccajan2196	Adzuki bean	Vang06g06990.1	2258	0	94	9	461
Ccajan22009	Adzuki bean	Vang07g05820.1	1132	7e-155	84	21	254
Ccajan22041	Adzuki bean	Vang0017s01160.1	532	4e-68	99	21	120
Ccajan22112	Adzuki bean	Vang06g00440.2	764	5e-101	99	1	136
Ccajan22156	Adzuki bean	Vang0004ss00140.1	665	4e-86	91	1	137
Ccajan2220	Adzuki bean	Vang06g09880.4	463	7e-59	84	9	153
Ccajan22222	Adzuki bean	Vang0032ss01940.1	429	1e-54	90	2	92
Ccajan22226	Adzuki bean	Vang05g10000.1	4214	0	95	57	896
Ccajan22285	Adzuki bean	Vang07g07250.1	718	2e-96	82	3	183
Ccajan22318	Adzuki bean	Vang11g03390.1	882	1e-119	86	1	232
Ccajan22322	Adzuki bean	Vang0090s00020.1	1062	2e-145	87	1	248
Ccajan22357	Adzuki bean	Vang07g05820.1	1244	2e-172	97	22	258
Ccajan22495	Adzuki bean	Vang05g06020.2	438	4e-53	83	8	107
Ccajan22507	Adzuki bean	Vang0005s01620.1	1819	0	88	9	427
Ccajan22550	Adzuki bean	Vang06g16040.2	645	3e-86	84	1	148
Ccajan22596	Adzuki bean	Vang03g12870.1	761	4e-103	89	1	171
Ccajan22634	Adzuki bean	Vang0010ss01000.1	2134	0	84	44	553
Ccajan22653	Adzuki bean	Vang03g03290.1	459	8e-59	88	65	165
Ccajan22658	Adzuki bean	Vang0057ss02130.1	1910	0	81	109	563
Ccajan22694	Adzuki bean	Vang0575s00010.1	1520	0	87	1	325
Ccajan2274	Adzuki bean	Vang0184s00350.1	1482	0	89	40	362
Ccajan22763	Adzuki bean	Vang04g01650.1	634	7e-84	81	12	177
Ccajan22885	Adzuki bean	Vang11g11630.4	1548	0	82	1	398
Ccajan22937	Adzuki bean	Vang0173s00120.2	750	1e-97	86	44	204
Ccajan22966	Adzuki bean	Vang07g02630.1	1064	5e-147	88	1	239
Ccajan2311	Adzuki bean	Vang11g07060.1	2779	0	82	1	645
Ccajan23160	Adzuki bean	Vang06g03430.1	910	2e-123	83	2	208
Ccajan23189	Adzuki bean	Vang02g03590.1	1748	0	85	35	471
Ccajan23211	Adzuki bean	Vang09g05900.1	1752	0	84	80	520
Ccajan23249	Adzuki bean	Vang0238s00100.1	1478	0	83	5	334
Ccajan23261	Adzuki bean	Vang0685s00030.1	289	3e-34	89	1	61
Ccajan23262	Adzuki bean	Vang05g07970.1	770	2e-101	82	84	279
Ccajan23313	Adzuki bean	Vang03g17860.1	310	2e-37	97	16	75
Ccajan23362	Adzuki bean	Vang11g14670.1	1688	0	91	23	383
Ccajan23375	Adzuki bean	Vang03g08250.1	890	2e-121	90	44	232
Ccajan23394	Adzuki bean	Vang0022ss02700.1	602	3e-78	96	1	114
Ccajan23510	Adzuki bean	Vang03g01200.2	2629	0	88	1	553
Ccajan23570	Adzuki bean	Vang04g03070.1	1560	0	85	30	386
Ccajan23654	Adzuki bean	Vang03g01100.1	624	2e-78	83	111	248
Ccajan23654	Adzuki bean	Vang03g01100.1	296	2e-30	82	1	72
Ccajan23751	Adzuki bean	Vang04g12130.1	547	2e-70	86	1	118
Ccajan23784	Adzuki bean	Vang09g01250.1	509	3e-63	89	18	151
Ccajan23803	Adzuki bean	Vang0065s00320.1	1801	0	85	1	413
Ccajan23857	Adzuki bean	Vang0026ss00240.1	797	3e-106	99	2	146
Ccajan24008	Adzuki bean	Vang0022ss04030.1	810	5e-109	88	10	178
Ccajan24009	Adzuki bean	Vang08g03280.1	2252	0	87	157	649
Ccajan24009	Adzuki bean	Vang08g03280.1	390	6e-40	92	13	87
Ccajan24048	Adzuki bean	Vang0763s00020.2	1676	0	85	67	426
Ccajan24070	Adzuki bean	Vang06g23810.1	3160	0	89	27	727
Ccajan24092	Adzuki bean	Vang11g05900.1	1120	6e-154	89	45	284
Ccajan24149	Adzuki bean	Vang10g06480.1	1463	0	88	54	363
Ccajan24177	Adzuki bean	Vang10g04860.1	1467	0	85	1	312
Ccajan24186	Adzuki bean	Vang05g04200.1	1503	0	82	28	376
Ccajan24455	Adzuki bean	Vang03g06110.1	355	2e-38	83	35	120
Ccajan24585	Adzuki bean	Vang08g00590.1	1754	0	84	12	432
Ccajan24754	Adzuki bean	Vang0685s00030.1	309	1e-36	100	1	60
Ccajan24932	Adzuki bean	Vang07g02240.1	232	1e-20	92	441	489
Ccajan25006	Adzuki bean	Vang10g02560.1	1500	0	93	1	294
Ccajan25046	Adzuki bean	Vang02g02830.1	3570	0	94	1	715
Ccajan25065	Adzuki bean	Vang04g04820.1	1267	6e-174	86	129	413
Ccajan25089	Adzuki bean	Vang04g00270.1	2012	0	88	1	433
Ccajan2509	Adzuki bean	Vang0071ss00650.1	2401	0	85	1	539
Ccajan25097	Adzuki bean	Vang11g02540.1	943	2e-127	81	1	234
Ccajan25288	Adzuki bean	Vang11g17360.1	609	2e-81	91	1	123
Ccajan2498	Adzuki bean	Vang11g13480.1	950	3e-130	83	14	229
Ccajan25364	Adzuki bean	Vang0449s00030.1	796	1e-104	89	34	201
Ccajan25439	Adzuki bean	Vang0126s00070.1	1256	3e-175	90	1	256
Ccajan25481	Adzuki bean	Vang0076s00200.1	1233	2e-171	84	1	277
Ccajan25534	Adzuki bean	Vang0155s00240.1	1145	1e-158	93	4	261
Ccajan2566	Adzuki bean	Vang04g01590.1	1163	8e-160	82	18	307
Ccajan2572	Adzuki bean	Vang0065s00360.1	1058	1e-142	90	1	244
Ccajan2599	Adzuki bean	Vang06g00520.1	1037	2e-142	81	29	270
Ccajan2572	Adzuki bean	Vang0065s00360.1	148	1e-10	81	236	272
Ccajan25652	Adzuki bean	Vang04g10070.2	2272	0	85	10	532
Ccajan25673	Adzuki bean	Vang0370s00080.1	766	4e-102	86	1	146
Ccajan25760	Adzuki bean	Vang0652s00030.1	403	3e-48	82	21	106
Ccajan25820	Adzuki bean	Vang07g02340.1	998	2e-135	85	9	261
Ccajan25846	Adzuki bean	Vang0109s00010.1	388	2e-41	86	237	317
Ccajan25932	Adzuki bean	Vang02g15470.1	427	3e-55	92	1	88
Ccajan25953	Adzuki bean	Vang02g11670.1	1557	0	85	1	346
Ccajan26037	Adzuki bean	Vang07g03460.1	683	5e-91	83	3	179
Ccajan26100	Adzuki bean	Vang06g14000.1	1205	9e-167	83	15	303
Ccajan26123	Adzuki bean	Vang10g00240.1	2490	0	86	1	547
Ccajan26488	Adzuki bean	Vang04g15420.1	755	4e-102	81	1	178
Ccajan26541	Adzuki bean	Vang0058ss00800.1	1271	3e-177	93	35	288
Ccajan26544	Adzuki bean	Vang0652s00030.1	415	4e-50	83	21	108
Ccajan26562	Adzuki bean	Vang02g03660.1	304	2e-35	95	1	61
Ccajan26629	Adzuki bean	Vang0613s00040.1	442	1e-55	89	1	92
Ccajan26673	Adzuki bean	Vang0071ss00480.1	1115	2e-150	82	126	389
Ccajan26722	Adzuki bean	Vang04g07910.1	420	2e-51	82	16	102
Ccajan26816	Adzuki bean	Vang0010ss02930.1	1837	0	82	653	1093
Ccajan26869	Adzuki bean	Vang04g04330.1	1060	1e-141	83	324	567
Ccajan26937	Adzuki bean	Vang03g09350.1	1027	5e-141	81	11	253
Ccajan26959	Adzuki bean	Vang02g05040.1	379	1e-45	83	132	217
Ccajan26968	Adzuki bean	Vang10g00980.1	1656	0	82	7	370
Ccajan26983	Adzuki bean	Vang06g04900.1	456	2e-54	94	1	89
Ccajan27174	Adzuki bean	Vang06g17500.1	663	3e-87	95	146	277
Ccajan27204	Adzuki bean	Vang06g00280.1	698	2e-90	96	11	144
Ccajan2723	Adzuki bean	Vang02g08480.1	379	4e-46	89	28	102
Ccajan27287	Adzuki bean	Vang0032ss01850.1	717	6e-97	94	22	162
Ccajan27307	Adzuki bean	Vang01g18210.1	869	2e-116	85	32	242
Ccajan27326	Adzuki bean	Vang01g05080.1	413	7e-48	81	1	96
Ccajan2733	Adzuki bean	Vang0942s00010.2	320	6e-38	92	22	97
Ccajan27332	Adzuki bean	Vang0021ss01940.1	943	9e-121	83	40	266
Ccajan27336	Adzuki bean	Vang01g18130.1	760	3e-100	97	245	389
Ccajan2734	Adzuki bean	Vang02g15380.1	423	2e-54	97	1	93
Ccajan27471	Adzuki bean	Vang05g10350.1	579	3e-74	89	98	234
Ccajan27487	Adzuki bean	Vang06g16250.1	219	2e-24	93	1	44
Ccajan27577	Adzuki bean	Vang0017s00300.1	701	1e-88	84	86	245
Ccajan27725	Adzuki bean	Vang0057s00490.1	970	2e-132	82	14	249
Ccajan27728	Adzuki bean	Vang0039ss01010.1	419	6e-53	98	78	158
Ccajan27792	Adzuki bean	Vang09g02390.1	453	5e-59	93	1	90
Ccajan27821	Adzuki bean	Vang01g05730.1	2300	0	81	6	532
Ccajan27892	Adzuki bean	Vang10g07110.3	1573	0	82	1	382
Ccajan27910	Adzuki bean	Vang11g08210.1	1120	3e-153	81	1	294
Ccajan28016	Adzuki bean	Vang0248s00160.1	2632	0	81	11	607
Ccajan28057	Adzuki bean	Vang06g24120.2	1411	0	81	94	392
Ccajan28109	Adzuki bean	Vang04g08000.1	460	4e-58	90	61	161
Ccajan28192	Adzuki bean	Vang0145s00790.2	947	1e-122	91	120	340
Ccajan28212	Adzuki bean	Vang0159s00470.1	1441	0	87	1	326
Ccajan28282	Adzuki bean	Vang0164s00290.1	1512	0	86	1	340
Ccajan28294	Adzuki bean	Vang06g08040.1	1834	0	81	10	447
Ccajan28408	Adzuki bean	Vang0615s00090.1	1610	0	83	3	381
Ccajan28448	Adzuki bean	Vang0076s00540.1	2278	0	88	1	491
Ccajan28506	Adzuki bean	Vang06g17240.1	871	1e-116	87	1	185
Ccajan28569	Adzuki bean	Vang07g01240.1	350	2e-43	82	1	85
Ccajan28582	Adzuki bean	Vang03g01050.1	1241	7e-166	96	1	235
Ccajan28582	Adzuki bean	Vang03g01050.1	312	5e-31	91	236	299
Ccajan28584	Adzuki bean	Vang04g12730.1	747	2e-100	82	4	195
Ccajan28697	Adzuki bean	Vang05g09750.2	1270	2e-176	84	1	291
Ccajan28742	Adzuki bean	Vang06g10700.1	789	3e-106	85	66	253
Ccajan28755	Adzuki bean	Vang04g12130.1	693	4e-93	84	1	159
Ccajan28778	Adzuki bean	Vang06g17820.1	654	1e-87	85	1	151
Ccajan28788	Adzuki bean	Vang0204s00260.1	3103	0	82	1	776
Ccajan28818	Adzuki bean	Vang03g17860.1	326	4e-39	87	6	75
Ccajan2901	Adzuki bean	Vang09g02050.1	3723	0	90	1	778
Ccajan29026	Adzuki bean	Vang0450s00090.1	1327	0	92	296	574
Ccajan29046	Adzuki bean	Vang0172s00220.1	152	7e-14	97	113	141
Ccajan29120	Adzuki bean	Vang0143s00280.1	172	5e-17	83	2	37
Ccajan29140	Adzuki bean	Vang0126s00020.1	1490	0	84	1	380
Ccajan29164	Adzuki bean	Vang0022ss01500.1	3237	0	87	1	719
Ccajan29170	Adzuki bean	Vang04g02330.1	1401	0	84	1	304
Ccajan29234	Adzuki bean	Vang0304s00140.1	956	9e-129	84	1	249
Ccajan29347	Adzuki bean	Vang11g18580.1	807	7e-108	83	100	279
Ccajan2953	Adzuki bean	Vang0002ss01900.2	3300	0	95	1	657
Ccajan29677	Adzuki bean	Vang01g06090.1	958	1e-131	81	1	217
Ccajan29731	Adzuki bean	Vang0815s00010.1	482	1e-61	91	81	192
Ccajan29753	Adzuki bean	Vang0867s00020.1	404	9e-51	81	11	122
Ccajan29768	Adzuki bean	Vang0767s00020.1	890	2e-120	90	1	203
Ccajan29821	Adzuki bean	Vang06g17620.1	2415	0	89	1	504
Ccajan29996	Adzuki bean	Vang0203s00250.1	1327	0	85	9	297
Ccajan30173	Adzuki bean	Vang04g03510.1	1403	0	88	1	316
Ccajan30177	Adzuki bean	Vang2464s00010.1	1453	0	90	3	331
Ccajan30183	Adzuki bean	Vang05g06430.1	150	7e-13	89	592	627
Ccajan30289	Adzuki bean	Vang0524s00010.1	767	4e-101	85	2	157
Ccajan30295	Adzuki bean	Vang0071ss00530.1	1104	4e-152	86	1	262
Ccajan30765	Adzuki bean	Vang11g04120.1	561	1e-73	84	3	145
Ccajan30831	Adzuki bean	Vang06g14860.1	217	8e-23	95	274	313
Ccajan30856	Adzuki bean	Vang10g03000.1	365	2e-41	86	63	142
Ccajan30956	Adzuki bean	Vang09g00760.1	1399	0	91	38	338
Ccajan31037	Adzuki bean	Vang06g07460.1	2756	0	86	1	606
Ccajan31256	Adzuki bean	Vang0733s00050.1	960	3e-129	86	164	378
Ccajan31373	Adzuki bean	Vang02g11670.1	296	3e-31	93	40	98
Ccajan31441	Adzuki bean	Vang0121s00760.1	1897	0	91	113	506
Ccajan31563	Adzuki bean	Vang11g05920.1	1191	6e-165	95	98	333
Ccajan31656	Adzuki bean	Vang04g14840.1	222	3e-24	85	12	94
Ccajan31674	Adzuki bean	Vang0026ss00210.1	1217	2e-155	89	1262	1514
Ccajan31734	Adzuki bean	Vang01g18130.1	649	3e-83	90	246	389
Ccajan31856	Adzuki bean	Vang10g04090.1	864	1e-117	82	3	211
Ccajan31894	Adzuki bean	Vang02g13700.1	1167	9e-162	89	32	284
Ccajan31957	Adzuki bean	Vang0070s00450.1	309	4e-36	100	1	61
Ccajan32377	Adzuki bean	Vang05g01270.1	666	3e-89	88	2	155
Ccajan3242	Adzuki bean	Vang06g08410.1	3767	0	84	1	834
Ccajan32512	Adzuki bean	Vang02g10700.1	3030	0	94	103	733
Ccajan32627	Adzuki bean	Vang0041ss00020.1	1208	4e-164	81	114	399
Ccajan32705	Adzuki bean	Vang0658s00060.1	451	6e-55	87	100	197
Ccajan32705	Adzuki bean	Vang0658s00060.1	276	1e-29	85	243	331
Ccajan32836	Adzuki bean	Vang0045ss00130.2	391	2e-47	96	22	97
Ccajan33018	Adzuki bean	Vang10g07150.1	426	5e-53	86	85	177
Ccajan33082	Adzuki bean	Vang11g06920.1	749	2e-99	97	197	339
Ccajan33122	Adzuki bean	Vang0021ss01940.1	901	7e-115	90	164	346
Ccajan33206	Adzuki bean	Vang0022ss01230.1	784	2e-104	90	34	206
Ccajan3324	Adzuki bean	Vang0004ss00580.2	2981	0	89	1	648
Ccajan33240	Adzuki bean	Vang02g11670.1	427	5e-51	83	1	98
Ccajan33350	Adzuki bean	Vang0010ss01650.1	1075	8e-148	84	36	277
Ccajan3588	Adzuki bean	Vang07g00340.1	4941	0	85	250	1336
Ccajan5984	Adzuki bean	Vang06g15650.1	4637	0	88	91	1091
Ccajan4643	Adzuki bean	Vang01g01860.1	4353	0	91	31	922
Ccajan9808	Adzuki bean	Vang11g13900.1	4303	0	87	1	1123
Ccajan9847	Adzuki bean	Vang02g10700.1	4156	0	84	103	1063
Ccajan3931	Adzuki bean	Vang03g03130.1	3622	0	81	1	853
Ccajan9697	Adzuki bean	Vang02g00600.2	3563	0	89	119	947
Ccajan8009	Adzuki bean	Vang11g07320.1	2984	0	86	74	724
Ccajan9899	Adzuki bean	Vang06g25020.1	2961	0	86	1	650
Ccajan6968	Adzuki bean	Vang0259s00030.1	2956	0	81	16	719
Ccajan5751	Adzuki bean	Vang0182s00740.1	2793	0	81	9	644
Ccajan3726	Adzuki bean	Vang01g00620.1	2770	0	94	1	543
Ccajan9176	Adzuki bean	Vang10g06720.1	2697	0	83	15	619
Ccajan3364	Adzuki bean	Vang0021ss00670.2	2498	0	82	28	613
Ccajan3103	Adzuki bean	Vang11g04530.1	2134	0	88	1	452
Ccajan3230	Adzuki bean	Vang06g05990.1	1748	0	81	54	484
Ccajan3246	Adzuki bean	Vang03g12580.1	1563	0	88	33	415
Ccajan3312	Adzuki bean	Vang11g13650.1	1471	0	85	2	357
Ccajan3354	Adzuki bean	Vang0045ss01060.1	1435	0	86	13	322
Ccajan3200	Adzuki bean	Vang05g04470.1	1425	0	83	1	339
Ccajan3205	Adzuki bean	Vang0010ss01050.1	1176	1e-162	90	2	238
[truncated: 1,200 more rows]
